# Supplementary material for: Atmospheric aging modifies the redox potential and toxicity of humic-like substances (HULIS) from biomass burning
Source: Royal Society of Chemistry journal article supplement (doi:10.1039/d3ea00104k), 2023-01-01
Supplement: d3ea00104k1.pdf [file d3ea00104k1.pdf]

## 1 **Electronic Supplementary Information**

### 2 **Atmospheric Aging Modifies the Redox Potential and Toxicity of Humic-like Substances** 3 **from Biomass Burning**

4 Chunlin Li <sup>a, e</sup>, Diego Calderon-Arrieta <sup>b</sup>, Michal Pardo <sup>a</sup>, Dongmei Cai <sup>c</sup>, Alexander Laskin <sup>b, d</sup>, Jianmin Chen <sup>c</sup>, Yinon  
5 Rudich <sup>a, \*</sup>

6 <sup>a</sup> Department of Earth and Planetary Sciences, Weizmann Institute of Science, Israel, 7600001.

7 <sup>b</sup> Department of Chemistry, Purdue University, West Lafayette, USA 47907.

8 <sup>c</sup> Department of Environmental Science & Engineering, Fudan University, Shanghai, China, 236400.

9 <sup>d</sup> Department of Earth, Atmosphere and Planetary Sciences, Purdue University, West Lafayette, USA 47907.

10 <sup>e</sup> College of Environmental Science and Engineering, Tongji University, Shanghai 200072, China

11 Corresponding author: Yinon Rudich ([yinon.rudich@weizmann.ac.il](mailto:yinon.rudich@weizmann.ac.il))

12 Assisting details of chemical box modeling of atmospheric aging, acellular assays, elemental quantification,  
13 molecular analysis, and lifetime assessment of HULIS together with standard redox-active compounds test in  
14 lung fluid mimics are provided in SI, including **8 texts, 16 figures and 2 tables.**

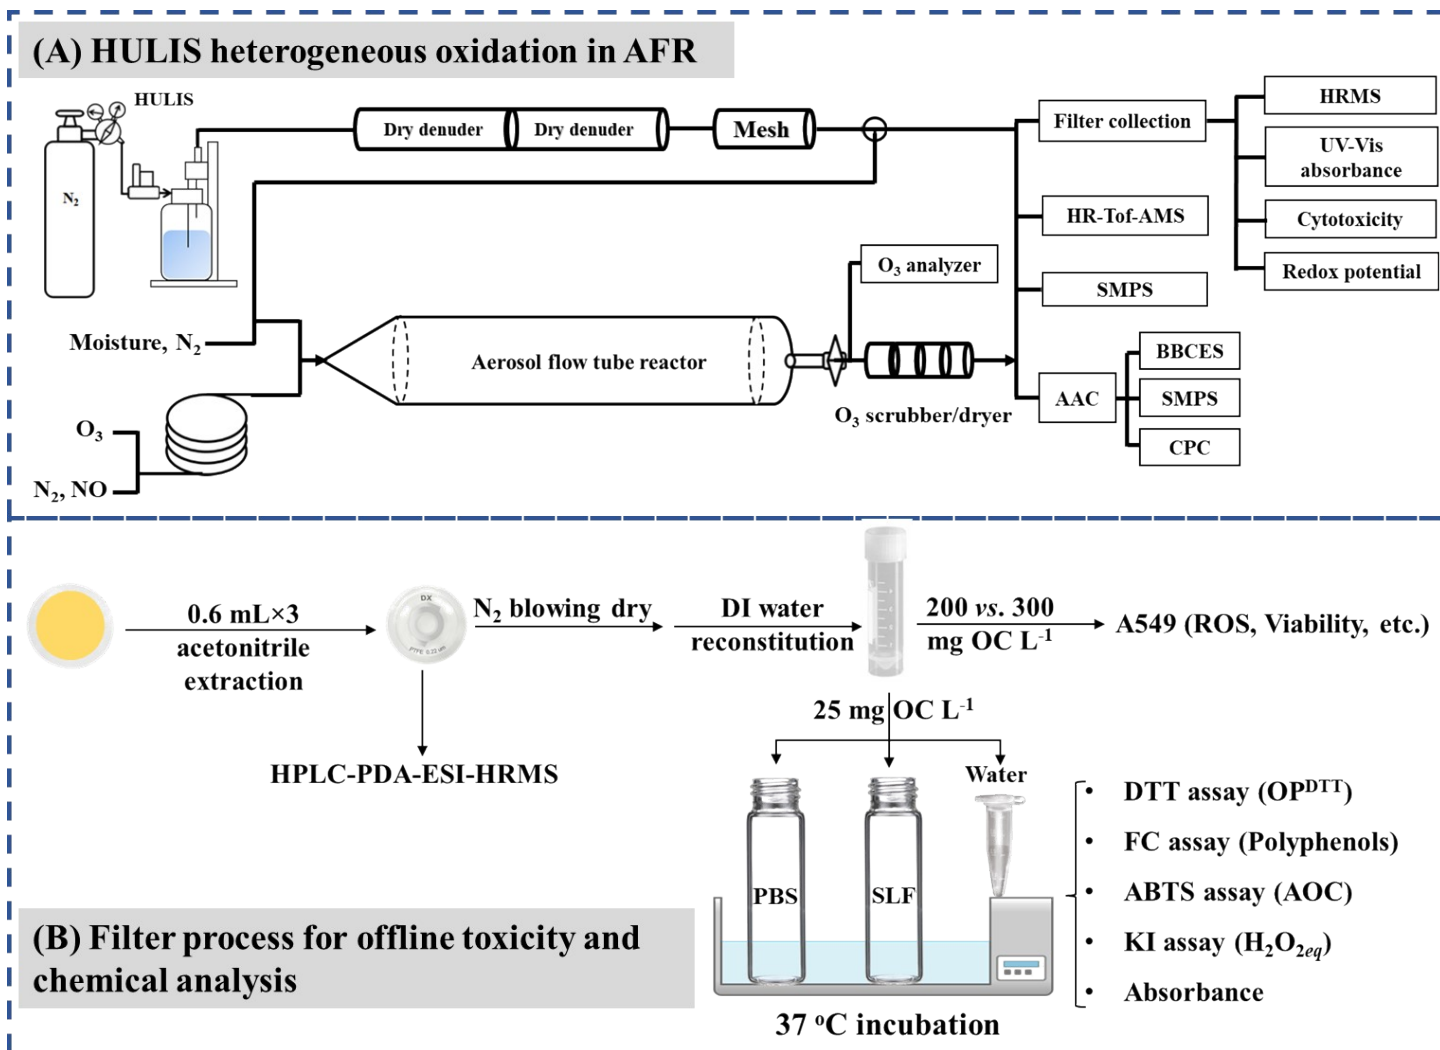

15 **Fig. S1.** (A) A schematic representation of the experimental setup and methods for HULIS aerosol generation, heterogeneous aging,  
 16 online characterization, and filter sampling. (B) Scheme of treatment and offline analysis of filter-loaded for chemical composition,  
 17 redox potential, and cytotoxicity measurements.

## 18 Text S1. O<sub>3</sub> uptake coefficients and chemical-box model simulation of NO<sub>3</sub>• aging

19 Three atmospheric nighttime aging scenarios, including *I.* dry ozonolysis (clean environment); *II.* O<sub>3</sub> oxidation under high  
 20 RH; *III.* NO<sub>3</sub>• dominated oxidation (simulating high NO<sub>x</sub> (polluted) environment), were simulated using an aerosol flow  
 21 tube reactor (AFR, Length: 180 cm, I.D: 10.5 cm) system and suspended HULIS aerosols. The total flow was fixed at 4 L  
 22 min<sup>-1</sup>. The Reynolds number (*Re*) was estimated to be around 510, indicating laminar flow (*Re* < 2300) in the AFR during  
 23 the experiments.

24 **For O<sub>3</sub> oxidation under high RH (scenario I and II)**, O<sub>3</sub> exposure and humidity (RH) level are important environmental  
 25 factors. Their effects on the ozonolysis of HULIS were tested. Under dry conditions (RH < 1.5%), the initial O<sub>3</sub> was set at 5,  
 26 15, and 25 ppmv. After that, RH was elevated stepwise to 30%, 45%, and 75% with a fixed initial O<sub>3</sub> of 25 ppmv. The  
 27 changes of O<sub>3</sub> and particle concentrations were continuously monitored downstream of the AFR. Before the experiments,  
 28 blank tests were conducted to characterize the reactants' loss to the inner wall of the AFR.

29 The ensemble first-order wall loss rates for O<sub>3</sub> ( $\kappa_{w,O_3}$ , s<sup>-1</sup>) and HULIS particles ( $\kappa_{w,p}$ , s<sup>-1</sup>) were calculated using Equation

30 S1 below:  

$$\kappa_w = \ln\left(\frac{C_0}{C}\right) / RT$$
 Eq.S1

32 Where  $C_0$  and  $C$  are the initial and endpoint pollutant concentration, respectively.  $RT$  (s) is the residence time of pollutants  
 33 in the AFR. The estimated wall loss rates of O<sub>3</sub>, particle surface area ( $S$ , μm<sup>2</sup> cm<sup>-3</sup>), and volume ( $V$ , μm<sup>3</sup> cm<sup>-3</sup>) concentrations  
 34 are summarized in **Table S1**.

35 In the actual experiments where O<sub>3</sub> and HULIS aerosol are mixed in the AFR system, the sink of O<sub>3</sub> as described in  
 36 Equation S2 includes wall loss ( $\kappa_{w,O_3}$ ) and particle surface uptake ( $\kappa_{p,O_3}$ )<sup>1,2</sup>:

37 
$$-\frac{dC_{O_3}}{dt} = \kappa_{w,O_3} \times C_{O_3} + \kappa_{p,O_3} \times C_{O_3}$$
 Eq.S2

38 Where  $\kappa_{p,O_3}$  can be expanded to Equation S3:

39 
$$\kappa_{p,O_3} = \frac{\gamma_{eff,O_3} \times \omega_{O_3} \times S_p}{4}$$
 Eq.S3

40 In Eq.S3,  $\gamma_{eff,O_3}$  is the effective uptake coefficient of O<sub>3</sub>.  $\omega_{O_3}$  is the mean thermal velocity of O<sub>3</sub> (361.12 m s<sup>-1</sup> at 1 atm and  
 41 295K).  $S_p$  is total particle surface area concentration of (3.0-3.6) × 10<sup>4</sup> μm<sup>2</sup> cm<sup>-3</sup>, which varied with time mainly due to  
 42 particle wall loss, neglecting gas-particle transfer modification. Based on the known particle surface area concentration wall

43 loss rates ( $\kappa_{w,p} \times S$ , s<sup>-1</sup>), Eq. S3 can be modified to Equation S4:

44 
$$\kappa_{p,O_3} = \frac{\gamma_{eff,O_3} \times \omega_{O_3} \times S_p}{4} = A \times e^{-\kappa_{w,p-S} \times t}$$
 Eq.S4  
 45  $S$  is the particles' initial surface area concentration.  $A$  is a simplified constant value that represents  $\frac{\gamma_{eff,O_3} \times \omega_{O_3} \times S}{4}$ . Eq

46 S2 was further modified to give the final integrated function of Eq. S5:

47 
$$\ln\left(\frac{C_{O_3,0}}{C_{O_3,RT}}\right) = \kappa_{w,O_3} \times RT + \frac{A}{\kappa_{w,p-S}} \times (1 - e^{-\kappa_{w,p-S} \times RT})$$
 Eq.S5

48 Based on the O<sub>3</sub> concentration changes following mixing with the aerosol, the effective uptake coefficients of O<sub>3</sub> by  
 49 HULIS aerosol were estimated and plotted in Figure S2. Clearly, the uptake coefficients are in range of 5.9 × 10<sup>-5</sup> and

50  $1.8 \times 10^{-4}$ , which are comparable with the reported values for soot and other organic aerosols and proxies.<sup>3,4</sup> The coefficients  
 51 vary exponentially in ascending trend with RH while in descending trend with initial O<sub>3</sub> concentration, agreeing with  
 52 previous studies.<sup>5,6</sup>

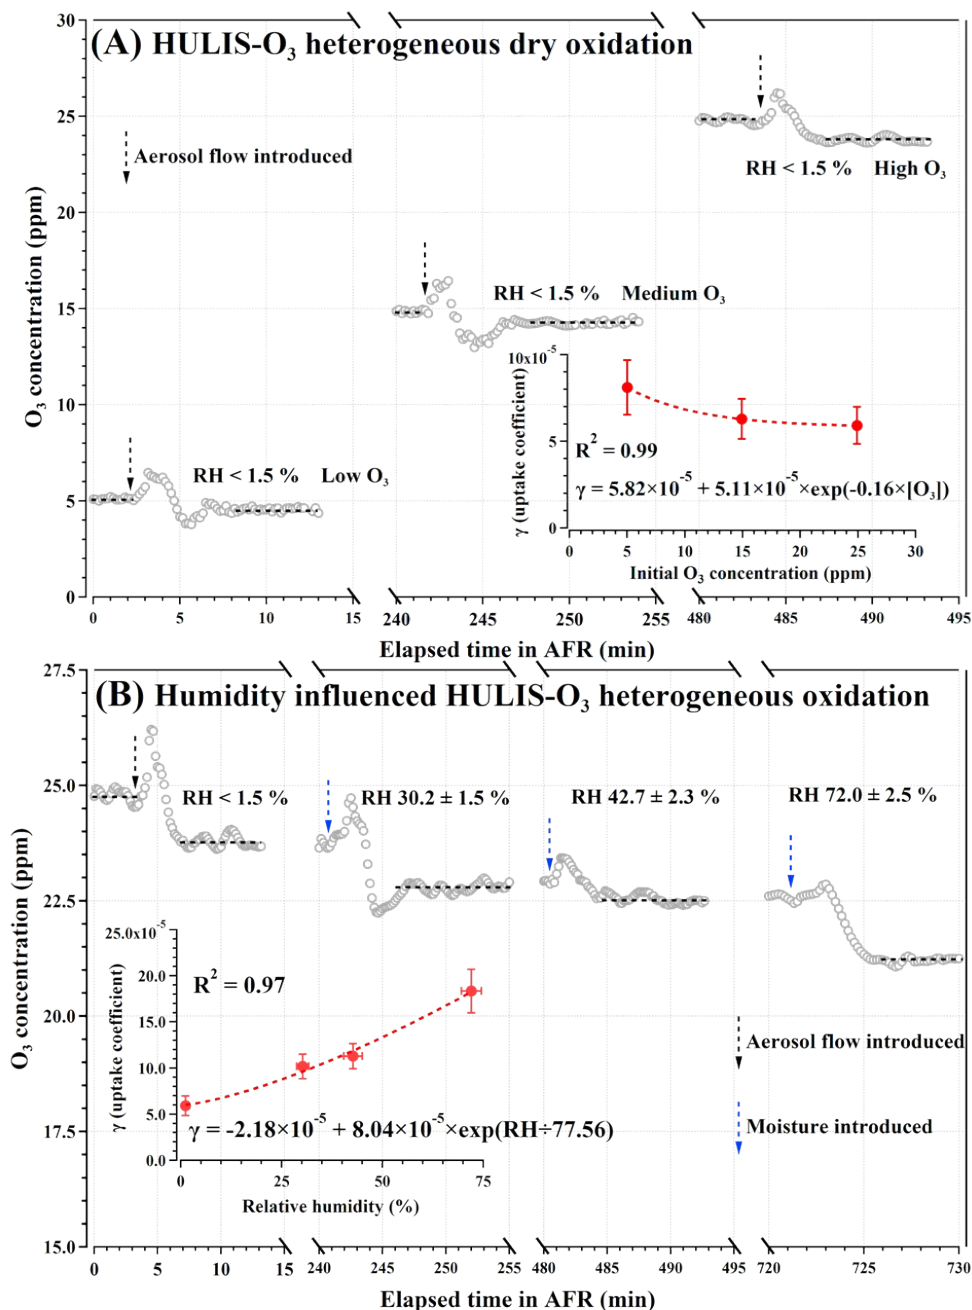

53 **Fig. S2.** Changes in O<sub>3</sub> concentration during the dry (A) and RH-dependent (B) ozonolysis of HULIS aerosols. Accordingly, the aerosol  
 54 effective uptake coefficients of O<sub>3</sub> were calculated in consideration of the pollutants' wall loss within the AFR. The insert figures plot  
 55 the HULIS particle uptake coefficients of O<sub>3</sub> as a function of the initial O<sub>3</sub> concentration and RH. These uptake coefficients were fitted  
 56 well using an exponential model.

57 **For NO<sub>x</sub> involved (NO<sub>3</sub>•) heterogeneous aging (scenario III),** a similar method using a chemical box model simulation  
 58 of gaseous oxidants uptake by particles and gas-particle reactor inner wall has been built and applied in our previous

59 studies.<sup>7,8</sup> Here, the box model was modified by applying some measured parameters rather than theoretical values. Briefly,  
 60 flow from a calibrated cylinder NO (50 ppmv in high purity N<sub>2</sub>, Gas Tech.) as NO<sub>x</sub> source was first mixed with external O<sub>3</sub>  
 61 flow through a long Teflon tube (I.D.:14 mm, Length: 2500 mm), where a series of oxidation reactions, especially reaction  
 62 R1-R3, occurred under dry condition (RH < 0.2%) to generate NO<sub>3</sub>• and N<sub>2</sub>O<sub>5</sub>:

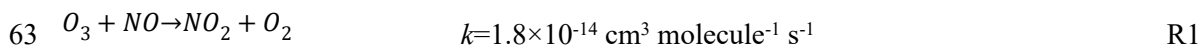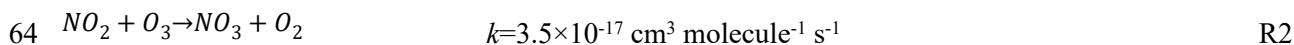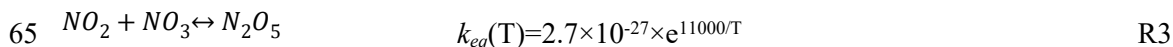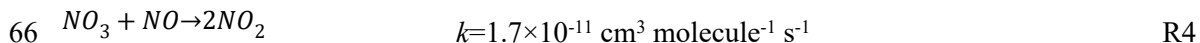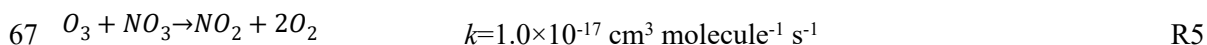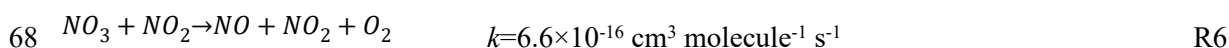

69 Two “pollution” levels were investigated and termed as low and high NO<sub>x</sub> (initially 1.0 vs. 5.0 ppm NO into the AFR)  
 70 condition, resulting in corresponding mixing time of about 30 s and 15 s with O<sub>3</sub> in the Teflon tube. Afterward, the steady  
 71 flow of NO<sub>y</sub> and O<sub>3</sub> mixtures was introduced into the AFR to mix with dehydrated HULIS aerosols. Similarly, apart from  
 72 gaseous reactions, the sink of these gaseous species ( $\frac{d[G]}{dt}$ ) can also be attributed to the pseudo-first-order loss to the particles’  
 73 surface ( $k_p[G]$ ) and to the AFR inner wall ( $k_w[G]$ ):

$$74 \quad \frac{d[G]}{dt} = - (k_p[G] + k_w[G]) \quad \text{Eq.S6}$$

$$75 \quad k_{p,G} = \frac{\gamma_{eff,G} \times \omega \times S}{4} = \frac{1}{4} \omega \times S \times \left( \frac{1}{\gamma_{p,G}} + \frac{1}{\Gamma_{diff-p,G}} \right)^{-1} \quad \text{Eq.S7}$$

$$76 \quad k_{w,G} = \frac{\gamma_{eff,G} \times \omega}{4} \times \frac{S_{AFR}}{V_{AFR}} = \frac{\omega}{D_{int}} \times \left( \frac{1}{\gamma_{w,G}} + \frac{1}{\Gamma_{diff-w,G}} \right)^{-1} \quad \text{Eq.S8}$$

$$77 \quad \frac{1}{\Gamma_{diff-w,G}} = \frac{\omega \times D_{int}}{4 \times 3.66 \times D} \quad \text{Eq.S9}$$

78 Where  $k_{p,G}$  and  $k_{w,G}$  are the pseudo-first order loss rates to the particles’ surface and to the reactor inner wall, respectively.  
 79  $\gamma_{eff,G}$  is an effective uptake coefficient (unitless) for gas  $G$ , such as O<sub>3</sub>, NO, NO<sub>3</sub>•, NO<sub>2</sub>, and N<sub>2</sub>O<sub>5</sub>.  $\omega$  (m/s) is the molecular  
 80 speed of gas  $G$ .  $S_{AFR}$  and  $V_{AFR}$  are the inner surface area and volume of Teflon tube or the AFR.  $D_{int}$  is the inner diameter of  
 81 the flow reactor, such as the Teflon tube (14 mm) and AFR (105 mm).  $D$  is the gas diffusion coefficient.  $\gamma_{p,G}$  and  $\gamma_{w,G}$  are  
 82 uptake coefficients (unitless) to the particulate surface and to the AFR inner wall of gaseous  $G$ , respectively.  $\Gamma_{diff,G}$  describes  
 83 the gas phase diffusion limited surface uptake by particles and reactor inner wall (unitless). For ultrafine particles like  
 84 HULIS aerosol in the current study, the heterogeneous reaction is limited by gas diffusion ( $\Gamma_{diff-p,G} \gg \gamma_{p,G}$ ), thus Equation  
 85 S7 can be modified, considering also particle wall loss as:

$$86 \quad k_{p,G} = \frac{\gamma_{eff,G} \times \omega \times S}{4} = \frac{1}{4} \omega \times S \times e^{-k_{w,p}t} \times \gamma_{p,G} \quad \text{Eq.S10}$$

87 As discussed in *Scenario I*, the measured first-order wall loss rate ( $k_{w,p-s}$ , s<sup>-1</sup>) for HULIS particle surface area concentration  
 88 under dry conditions is  $(2.84 \pm 0.33) \times 10^{-4}$  s<sup>-1</sup>. To simplify, a time-averaged  $k_{p,G}$  was estimated over the residence time (RT)  
 89 of particles in the AFR:

$$k_{p,G}' = \frac{\int_0^{RT} k_{p,G} dt}{RT} = \frac{\omega \times S \times \gamma_{p,G}}{4 \times RT \times k_{w,p-s}} (1 - e^{-k_{w,p-s} \times RT}) = 0.963 \times \frac{1}{4} \omega \times S \times \gamma_{p,G} \quad \text{Eq.S11}$$

91 When the loss rates of the gases to the reactor wall are not determined by surface reactivity, but by the diffusion through  
 92 the gas phase ( $\gamma_{w,G} > \Gamma_{diff-w,G} \sim 7 \times 10^{-6}$ ), the following expression holds:

$$k_{w,G} = \frac{\omega}{D_{int}} \times \left( \frac{1}{\gamma_{w,G}} + \frac{1}{\Gamma_{diff-w,G}} \right)^{-1} \approx \frac{\omega \times \Gamma_{diff-w,G}}{D_{int}} = \frac{4 \times 3.66 \times D}{D_{int}^2} \quad \text{Eq.S12}$$

94 Equation S12 is valid for Peclet numbers in excess of  $\sim 20$ <sup>9</sup>. The wall loss rates of NO and NO<sub>2</sub> in the Teflon tube and in  
 95 the AFR have been characterized using NO<sub>x</sub> analyzer (Model 49i, Thermo) with standard cylinder gases. The ozone wall  
 96 loss rate in the Teflon tube was measured to be around  $6.67 \times 10^{-5}$  s<sup>-1</sup>, and the loss rate in the AFR was cited from Scenario  
 97 *I* experiments as average of high and medium O<sub>3</sub> conditions. The wall loss rates of O<sub>3</sub>, NO, and NO<sub>2</sub> are summarized in  
 98 **Table S1**.

99 To NO<sub>3</sub>• and N<sub>2</sub>O<sub>5</sub>, their wall loss rates in the current experiments were tentatively estimated based on Equation S8.  
 100 Diffusion coefficients were taken as  $92 \pm 46$  and  $65 \pm 33$  Torr cm<sup>2</sup> s<sup>-1</sup> for NO<sub>3</sub>• and N<sub>2</sub>O<sub>5</sub>, respectively, in air/N<sub>2</sub> environment  
 101 (1 atm and 296.6 K).<sup>10</sup> This study results in Peclet numbers above 20 for all gases in both Teflon tube and the AFR, verifying  
 102 the validity of Equation S12 in gaseous wall loss estimation in this work. The effective uptake coefficient ( $\gamma$ ) depends on  
 103 the type of surface, the gaseous reactant, and many environmental parameters.<sup>1,2</sup> Overall, based on equations EqS8-S9 we  
 104 collected all the uptake coefficients and applied the average values of  $(9.87 \pm 7.53) \times 10^{-6}$ ,  $(1.1 \pm 0.2) \times 10^{-2}$ ,  $(6.10 \pm 1.82) \times 10^{-5}$ ,  
 105 and  $(6.73 \pm 2.36) \times 10^{-7}$  for O<sub>3</sub>, NO<sub>3</sub>•, N<sub>2</sub>O<sub>5</sub>, and NO<sub>2</sub> onto biomass burning related organic aerosols, respectively.<sup>11,12</sup>  
 106 Accordingly, the first-order loss rate of gaseous species to HULIS particles were calculated and are presented in **Table S1**.  
 107

108 **Table S1.** Parameters estimated for Chemical box model simulation.

| Scenario I and II<br>(Pristine O <sub>3</sub> oxidation) | $k_{w,O_3}$ in AFR (s <sup>-1</sup> )          | $k_{w,p-s}$ in AFR (s <sup>-1</sup> ) | $k_{w,p-v}$ in AFR (s <sup>-1</sup> )    | $\gamma_{eff,O_3}$               |                                  |
|----------------------------------------------------------|------------------------------------------------|---------------------------------------|------------------------------------------|----------------------------------|----------------------------------|
| Dry, 5 ppm O <sub>3</sub>                                | $(2.62 \pm 0.22) \times 10^{-5}$               | $(2.84 \pm 0.33) \times 10^{-4}$      | $(2.30 \pm 0.36) \times 10^{-4}$         | $(8.10 \pm 1.57) \times 10^{-5}$ |                                  |
| Dry, 15 ppm O <sub>3</sub>                               | $(2.26 \pm 0.17) \times 10^{-5}$               | $(2.84 \pm 0.33) \times 10^{-4}$      | $(2.30 \pm 0.36) \times 10^{-4}$         | $(6.28 \pm 1.15) \times 10^{-5}$ |                                  |
| Dry, 25 ppm O <sub>3</sub>                               | $(1.96 \pm 0.20) \times 10^{-5}$               | $(2.84 \pm 0.33) \times 10^{-4}$      | $(2.30 \pm 0.36) \times 10^{-4}$         | $(5.91 \pm 1.07) \times 10^{-5}$ |                                  |
| 30% RH, 25 ppm O <sub>3</sub>                            | $(3.63 \pm 0.51) \times 10^{-5}$               | $(5.22 \pm 0.49) \times 10^{-4}$      | $(4.25 \pm 0.39) \times 10^{-4}$         | $(1.02 \pm 0.13) \times 10^{-4}$ |                                  |
| 45% RH, 25 ppm O <sub>3</sub>                            | $(4.09 \pm 0.52) \times 10^{-5}$               | $(6.54 \pm 0.40) \times 10^{-4}$      | $(5.58 \pm 0.30) \times 10^{-4}$         | $(1.13 \pm 0.14) \times 10^{-4}$ |                                  |
| 75% RH, 25 ppm O <sub>3</sub>                            | $(8.83 \pm 0.75) \times 10^{-5}$               | $(9.80 \pm 0.53) \times 10^{-4}$      | $(7.49 \pm 0.44) \times 10^{-4}$         | $(1.84 \pm 0.24) \times 10^{-4}$ |                                  |
| Scenario III                                             | Peclet Number                                  |                                       | first-order loss rate (s <sup>-1</sup> ) |                                  |                                  |
|                                                          | Teflon tube<br>(low NO <sub>x</sub> , 1ppm NO) | AFR                                   | $k_{w,G}$ in Teflon tube                 | $k_{w,G}$ in AFR                 | $k_{p,G}'$ in AFR                |
| NO                                                       | 58 ± 20                                        | 51 ± 18                               | < 0.0001                                 | < 0.0001                         | ---                              |
| O <sub>3</sub>                                           | 68 ± 4                                         | 60 ± 4                                | $(6.67 \pm 0.67) \times 10^{-5}$         | $(2.11 \pm 0.19) \times 10^{-5}$ | $(1.59 \pm 0.30) \times 10^{-4}$ |
| NO <sub>2</sub>                                          | 65 ± 23                                        | 58 ± 20                               | $(1.04 \pm 0.36) \times 10^{-4}$         | $(5.16 \pm 1.80) \times 10^{-4}$ | $(1.79 \pm 0.63) \times 10^{-6}$ |

|                               |          |         |             |                                |                                |
|-------------------------------|----------|---------|-------------|--------------------------------|--------------------------------|
| NO <sub>3</sub> •             | 75 ± 38  | 67 ± 33 | 0.90 ± 0.45 | (1.61 ± 0.80)×10 <sup>-2</sup> | (2.50 ± 0.46)×10 <sup>-2</sup> |
| N <sub>2</sub> O <sub>5</sub> | 106 ± 54 | 95 ± 48 | 0.64 ± 0.32 | (1.14 ± 0.56)×10 <sup>-2</sup> | (1.16 ± 0.32)×10 <sup>-4</sup> |
| Particles                     | ---      | ---     | ---         | (2.84 ± 0.33)×10 <sup>-4</sup> | ---                            |

109 Note:  $k_{w, O_3}$  is the first-order wall loss rate of O<sub>3</sub>,  $k_{w, p-S}$  and  $k_{w, p-V}$  indicate first-order wall loss rate of bulk aerosol surface area and  
110 volume concentration, respectively.  $\gamma_{eff, O_3}$  indicates the effective surface uptake coefficient of O<sub>3</sub> by HULIS particles.  $k_{w, G}$  and  $k'_{p, G}$   
111 denote pseudo-first order loss rate of corresponded gaseous species to inner wall and particles, respectively.

112 Applying the above simplified kinetic parameters, a chemical box model including gaseous NO<sub>3</sub>• formation and gaseous  
113 oxidants uptake by HULIS aerosol and by the reactor wall was initialized using the COPASI software (complex pathway  
114 simulator, <http://copasi.org/>), and the result for low and high NO<sub>x</sub> experiments are displayed in Figure S3. By comparing  
115 the measured O<sub>3</sub> concentration changes with box-model simulated ones, the box-model worked well although it gave  
116 slightly higher O<sub>3</sub> concentrations.

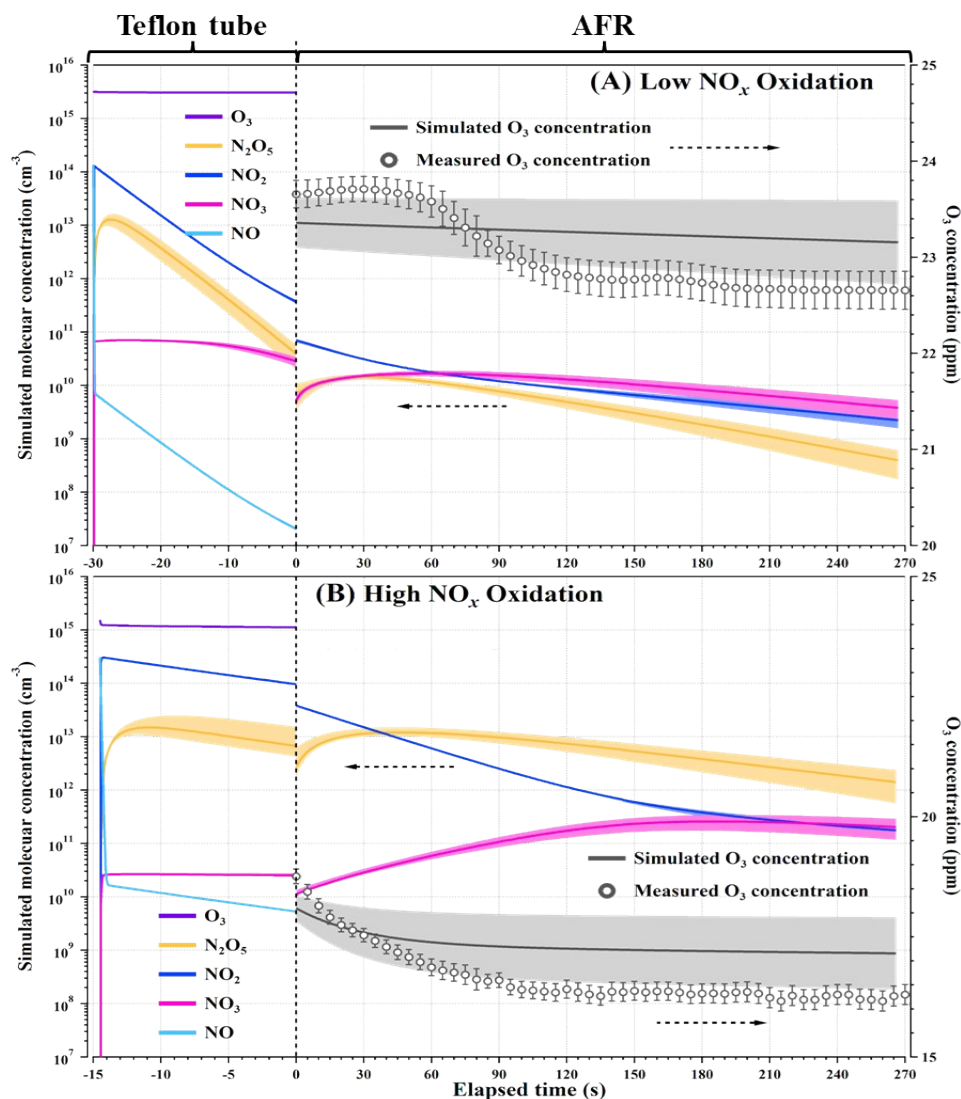

117 **Fig. S3.** Box-model simulated gaseous oxidants evolution in the Teflon tube and the AFR for  $\text{NO}_x$ -involved HULIS heterogeneous  
 118 aging. The monitored  $\text{O}_3$  concentration changes were compared with the box-model simulated results.

119  $\text{NO}_3\bullet$  exposure ( $[\text{NO}_3]_{\text{exp}}$ , molecules  $\text{cm}^{-3}$  s) was estimated for HULIS particles in the AFR:

$$120 \quad [\text{NO}_3\bullet]_{\text{exp}} = \int_0^t [\text{NO}_3] dt \quad \text{Eq.S13}$$

121 For low  $\text{NO}_x$ - $\text{O}_3$  oxidation,  $\text{NO}_3\bullet$  exposure was  $(5.78 \pm 1.07) \times 10^{12}$  molecules  $\text{cm}^{-3}$  s. The corresponding exposure upon high  
 122  $\text{NO}_x$  level oxidation was  $(4.26 \pm 0.84) \times 10^{13}$  molecules  $\text{cm}^{-3}$  s. Assuming a typical concentration of 20 ppt for field  $\text{NO}_3\bullet$  at  
 123 night, the estimated  $\text{NO}_3\bullet$  exposures in the AFR equals to  $3.3 \pm 0.6$  and  $24.2 \pm 4.8$  hours' exposure of ambient nighttime  $\text{NO}_3\bullet$ ,  
 124 respectively.

125 In addition, the modeled  $\text{NO}_3\bullet$  uptake by HULIS particles was  $(2.43 \pm 0.68) \times 10^{11}$  and  $(8.91 \pm 2.21) \times 10^{11}$  molecules  $\text{cm}^{-3}$  at  
 126 low and high  $\text{NO}_x$  condition, respectively. The equivalent field exposure time ( $t$ ) can also be calculated via Equation S14:

$$127 \quad t = \frac{[\text{NO}_3\bullet]_{\text{uptake}}}{k_{p,\text{NO}_3} \times [\text{NO}_3\bullet]} \quad \text{Eq.S14}$$



128 Where  $F$  is  $\text{NO}_3\cdot$  uptake by HULIS particles,  $k'_{p,G}$  is first-order  $\text{NO}_3\cdot$  loss rate to HULIS particles (summarized in Table  
129 S1),  $[\text{NO}_3\cdot]$  is field average  $\text{NO}_3\cdot$  concentration (20 ppt). Accordingly, the final equivalent filed exposure time was  $5.5\pm 1.9$   
130 and  $20.2\pm 6.2$  hours, which are quite similar to the values estimated via  $\text{NO}_3\cdot$  exposure method.

## 131 **Text S2. UHPLC-PDA-ESI(-/+)-HRMS analysis**

132 Four HULIS samples (fresh, 25ppm O<sub>3</sub> oxidized under dry and 45% RH, and highly NO<sub>3</sub>• oxidized) were extracted into  
133 acetonitrile (Optima LC/MS grade, Fisher Chemical) via sonication (Quantrex 140 sonicator). The final solutions were  
134 filtrated using PTFE syringe filters (0.2 μm pore size, Thermo Scientific) and adjusted to about 100 μg mL<sup>-1</sup> HULIS in  
135 acetonitrile. An operational blank was prepared by performing the same extraction procedure.

136 Samples were injected into a Luna Omega Polar C18 UHPLC reversed-phase column (2.1 mm × 50 mm, 1.6 μm particles,  
137 100 Å pores, Phenomenex Inc.). The injection volume of each sample was 30 μL to achieve 3 μg injected mass of HULIS,  
138 assuming that injected mass was equivalent to organic material mass.

139 Gradient elution was performed by adapting the HPLC method from Lin et al (2018)<sup>13</sup> to a corresponding UHPLC method  
140 with a constant flow rate of 0.4 mL/min: 10% acetonitrile at 0-0.5 min, linear gradient to 100% acetonitrile at 0.5-16.5 min,  
141 100% acetonitrile at 16.5-18.5 min, linear gradient back to the initial conditions at 18.5-19 min, and initial conditions at 19-  
142 24 min to recondition the column for the next sample run. Following the UHPLC separation, the eluents passed through  
143 PDA and an Orbitrap HRMS mass analyzer equipped with an ESI source. The ESI source was operated with the following  
144 conditions: spray voltage of 3 kV, capillary temperature of 300 °C, 50 units of sheath gas flow, 12 units of auxiliary gas  
145 flow, 2.5 units of spare gas flow, a maximum spray current of 100 V, a probe heater temperature of 250 °C, and an S-lens  
146 RF level of 40 V. The ESI analysis was conducted in alternating polarities.

147 UHPLC-PDA-ESI(-/+)-HRMS data were acquired using Thermo Scientific Xcalibur software and processed by MZmine  
148 code (<http://mzmine.github.io/>), which performed deconvolution, smoothing, and alignment of LC-MS peaks. Formulas  
149 were assigned for species within that specific time range using a suite of Excel macros and the MIDAS formula calculator  
150 (<https://nationalmaglab.org/user-facilities/icr/icr-software>).<sup>14</sup> The formula assignments were limited to compounds  
151 containing C<sub>0-50</sub>H<sub>0-100</sub>O<sub>0-50</sub>N<sub>0-3</sub>. In addition, O was indispensable in all formulas that were detected via -ESI mode. A single  
152 Na atom was allowed for assignments of MS features detected in +ESI mode. Neutral formulas for [M-H]<sup>-</sup> ionized  
153 compounds were determined by adding the mass of hydrogen. During the assignment procedure, one dimensional Kendrick  
154 Mass Defect analysis did not suggest the presence of sodium formate [M+(NaHCO<sub>2</sub>)<sub>x</sub>-H]<sup>-</sup> adducts in -ESI mode, therefore,  
155 they were not assigned in the HULIS samples.<sup>15</sup> Neutral formulas for [M+H]<sup>+</sup> and [M+Na]<sup>+</sup> ionized compounds were  
156 determined by subtracting the mass of hydrogen or sodium, respectively.

157 The O/C and H/C values for the Van Krevelen diagram (VK), double-bond equivalent (DBE), aromaticity index (AI), and  
158 maximum carbonyl ratio (MCR) values for molecular corridor plots were determined using the corresponding formulas of  
159 neutral CHO species.<sup>16</sup>

160 Double-bond equivalent (DBE) is calculated via Equation S15:

$$161 \quad DBE = C - 0.5H + 0.5N + 1 \quad \text{Eq.S15}$$

162 Aromaticity index (AI) of the assigned CHO molecule is calculated using equation S16:

$$163 \quad AI = \frac{1 + C - O - 0.5H}{C - O} \quad \text{Eq.S16}$$

164 Maximum carbonyl ratio (MCR) for only  $C_C H_H O_O$  species is calculated according to Equation S17:

$$165 \quad MCR = \frac{DBE}{O}$$

Eq.S17

166 The C, H, and O indicates element numbers in assigned CHO formulas. Noteworthy, MCR indicates the maximum criteria  
167 for the presence of carbonyl functionalities. If the number of oxygen atoms in the molecule is smaller than its DBE, then  
168 the MCR is considered to equal 1 (i.e., all oxygen atoms contribute to the DBE). MCR values <0.2 usually correspond to  
169 very highly oxidized species, MCR values >0.2-0.5 are frequently observed in highly oxidized species, MCR values >0.5-  
170 0.9 belong to intermediately oxidized species, and MCR values >0.9 suggest oxidized unsaturated and highly unsaturated  
171 species.<sup>16</sup>

### 172 Text S3. Total peroxide ( $\text{H}_2\text{O}_2$ ) quantification and Oxidative Potential (OP) assessment

173 **The total peroxides**, including inorganic hydrogen peroxide ( $\text{H}_2\text{O}_2$ ) and organoperoxides (ROOR, ROOH) in HULIS  
174 solutions, were quantified based on the iodometric-spectrophotometric method,<sup>17,18</sup> in which peroxides oxidize  $\text{I}^-$  in acidic  
175 conditions to generate  $\text{I}_2$ , and  $\text{I}_2$  reacts with  $\text{I}^-$  to form the yellow stable product of  $\text{I}_3^-$ . These color-changing reactions  
176 generally end within 1 h. Before the experiment, 1.5 g  $\text{L}^{-1}$  oxalic acid and 1.0 M KI stock solution were prepared separately  
177 in MiliQ water and bubbled with pure  $\text{N}_2$  to remove dissolved oxygen overnight.  $\text{H}_2\text{O}_2$  was applied as the standard chemical  
178 to create the calibration curve between the initial peroxide concentration and final solution absorbance at 350 nm and 400  
179 nm. The method was verified by incubating a mixture of 2.2 mL oxalic acid solution, 0.3 mL KI solution, and 0.5 mL  
180 deionized water or PBS vs. 45 and 450  $\mu\text{M}$   $\text{H}_2\text{O}_2$  under dark and in oxygen-free conditions. Absorption by the mixture  
181 solutions was measured every 15 min from incubation. As shown in Figure S4A-B, the chromogenic reactions finished in  
182 about 1h, after which the solution absorbance stabilized for at least 1 h. Absorption calibration curves with  $\text{H}_2\text{O}_2$   
183 concentration in the range of 5-200  $\mu\text{M}$  were generated at 350 and 400 nm (Figure S2C). There is no difference in  
184 absorbance- $\text{H}_2\text{O}_2$  concentration in water and PBS, only the average results were used for generating the calibration curves.

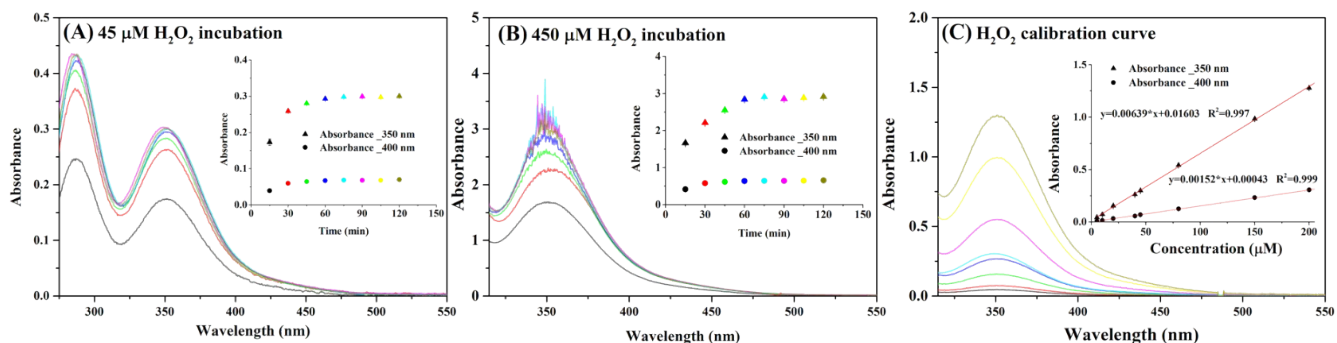

185 **Fig. S4.** Iodometric-spectrophotometric method for quantifying peroxide concentration. (A)-(B) method validation and incubation  
186 time optimization. (C) Calibration curve for standard  $\text{H}_2\text{O}_2$  concentration and final solution absorbance after 1 h incubation.

187 **Oxidative potential (OP)** of particulate matter was measured using a modified method modified from Chao et al. (2008).  
188 Briefly, the HULIS solution was incubated with 0.1 mM DTT in PBS (0.1 M, pH7.4, Chelex 100 Sodium form resin treated)  
189 at 37  $^{\circ}\text{C}$  under dark conditions. Every 5 min, aliquot of incubated mixture was withdrawn and mixed subsequently with 10%  
190 w/v trichloroacetic acid (TCA,  $\geq 99.0\%$ , Sigma-Aldrich), 0.1 mM 5,5-dithio-bis-(2-nitrobenzoic acid) (DTNB,  $\geq 99.0\%$ ,  
191 Sigma-Aldrich, prepared in PBS), and 0.4 M Tris-buffer (Trizma-base,  $\geq 99.9\%$ , Sigma). Remained DTT reacted with  
192 DTNB to form yellow products with specific absorbance at 412 nm. Based on the built calibration curve (Figure S5A), DTT  
193 concentration can be quantified.

194 Assuming a pseudo-first-order reaction, DTT depletion rate ( $OP^{DTT}$ ,  $\mu\text{mol L}^{-1} \text{min}^{-1}$ ) was derived. It was assured that less  
195 than 25% of DTT was consumed during incubation. Noteworthy, the initial absorbance ( $Ab_{S_0}$ ) at 412nm was further  
196 corrected from the background absorption by HULIS. Corrected by operational blank, DTT depletion rates divided by  
197 organic carbon (OC) mass concentration in extracts give mass normalized oxidative potential ( $OP_{OC}^{DTT}$ ,  $\text{pmol min}^{-1} \mu\text{g}^{-1} \text{OC}$ ).  
198 HULIS OC mass concentration was determined using a total organic carbon analyzer (TOC- $V_{\text{C}_{\text{PH}}}$ , Shimadzu). OP for

199 standard 1,4-naphthoquinone (1,4-NQ) and H<sub>2</sub>O<sub>2</sub> as positive controls were measured frequently to ensure the reliability of  
 200 the DTT assay. As shown in Figure S5B-C, 1,4-naphthoquinone has perfect linear regression between concentration and  
 201 DTT depletion rate, indicating the catalytic behavior of 1,4-NQ in redox reaction with DTT. While H<sub>2</sub>O<sub>2</sub> roughly presents  
 202 a linear relationship with DTT consumption rate, it is reasonable that peroxides act as noncatalytic oxidizers in redox  
 203 cycling. Overall, the regressed normalized OP is 3.91±0.27 nmol min<sup>-1</sup> μmol<sup>-1</sup> and 3.96±0.37 nmol min<sup>-1</sup> μmol<sup>-1</sup> for 1,4-NQ  
 204 and H<sub>2</sub>O<sub>2</sub>, respectively. These values agree with the reported results in relevant publications.<sup>19,20</sup>

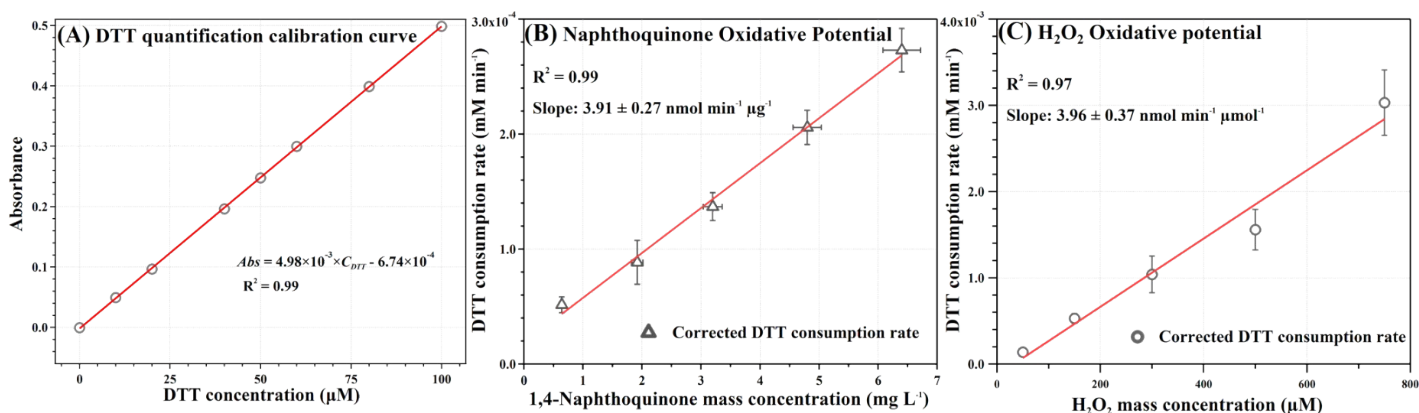

205 **Fig. S5.** (A) Calibration curve of DTT concentration vs. absorbance at 412 nm. DTT assay based oxidative potential of 1,4-  
 206 Naphthoquinone (B) and hydrogen peroxides (C).

207 **Text S4. Gallic equivalent phenolic assay (GAE) and Trolox equivalent antioxidant capacity (TEAC)**

208 **Folin-Ciocalteu's phenol (FC) reagent assay** was applied to quantify GAE in HULIS.<sup>21</sup> To avoid unexpected radical  
209 scavenging, no organic solvent (e.g., methanol, ethanol, acetone, etc.) was used in the assay. Briefly, gallic acid (97.5-  
210 102.5%, Product No. G7384, Sigma-Aldrich) stock solutions in molar concentration range of 50-300  $\mu\text{M}$  (50, 75, 100, 125,  
211 150, 200, 250, 300  $\mu\text{M}$ ) were prepared in both deionized water and PBS. 0.45 mL stock solution of each concentration  
212 mixed with 0.05 mL FC reagent (F9252, Sigma-Aldrich) at room temperature for 6 min. Then it was mixed with 1.0 mL of  
213 4.5 % w:v  $\text{Na}_2\text{CO}_3$  (>99%, Merck) and incubated at 37 °C for 30 min. The final solution absorbance in wavelength range of  
214 200-850 nm (0.5 nm resolution) was recorded using an Ocean-optic UV-Vis spectrometer (USB650). The linear regression  
215 between blank-corrected characteristic absorption at 750 nm and gallic acid concentration was developed as calibration  
216 curve of GEA. The result is displayed in Figure S6A-B.

217 **ABTS free radical scavenging method** was applied to provide TEAC of HULIS samples. In test, stock solution of ABTS  
218 (2,2'-azino-di-(3-ethylbenzthiazoline sulfonic acid), A3219, Sigma-Aldrich) was ready to use. 5 mM Trolox in PBS (1.0 $\times$ ,  
219 Biological Industries) was prepared, then diluted to 5-125  $\mu\text{M}$  (5, 10, 25, 50, 75, 100, 125  $\mu\text{M}$ ) in MiliQ water and PBS as  
220 stock solutions. 9.8 mM potassium persulfate ( $\geq$ 99%, Merck) was prepared freshly, and mixed with ABTS solution in  
221 volume ratio of 1:3. The mixture was kept in the dark at room temperature for 16 h. The produced  $\text{ABTS}^{+\cdot}$  in blue-green  
222 color was stable and used within 6 h. Before use,  $\text{ABTS}^{+\cdot}$  solution was diluted with MiliQ water to absorption of 0.7 ( $\pm$ 0.02)  
223 at 734 nm. Then, 1.0 mL diluted  $\text{ABTS}^{+\cdot}$  solution and 0.2 mL Trolox solution was mixed at room temperature, the absorption  
224 of the mixture was recorded continuously, the absorbance at 734 nm at exactly 6 min of incubation for Trolox ( $Abs_{Tro}$ ) and  
225 blank ( $Abs_0$ ) was taken. The percentages  $(1-Abs_{Tro}/Abs_0)\times 100\%$  against Trolox concentrations were linear-regressed as  
226 calibration curve (Figure S6C-D), via which TEAC of HULIS samples following same testing procedures were derived.  
227 Apart from Trolox, reduced L-glutathione (GSH) and DTT were also used as standard to get better antioxidative information  
228 of HULIS in comparing with various antioxidants.

229 It was found that solvent (water vs. PBS) has no significant influence on absorption response in GAE and TEAC methods,  
230 gallic acid and trolox both present linear relationship between characteristic absorption and concentration. But to antioxidant  
231 like DTT and GSH, the solvent effect is clear and an exponential-function fits well for absorbance against concentration.

232 **Extraction efficiency** for the method (acetonitrile extraction- $\text{N}_2$  blow dry-DI water reconstitution) was assessed by spiking  
233 fix amount of standard trolox and gallic acid solutions onto blank Teflon filters, then these filters were treated with same  
234 extraction and chemical quantification procedures. An average recovery rate of  $96.5\pm 2.6\%$  ( $95.7\pm 3.2\%$  for Trolox,  
235  $97.3\pm 1.8\%$  for Gallic acid, respectively) was estimated and applied to correct corresponded results. Besides, HULIS  
236 extraction efficiency was also assessed by measuring absorption of retained BrC on acetonitrile extracted Teflon filters, it  
237 was found that no more BrC resided on teflon filters after three times acetonitrile extraction as conducted in the methods,  
238 demonstrating the high extraction efficiency of HULIS in current study.

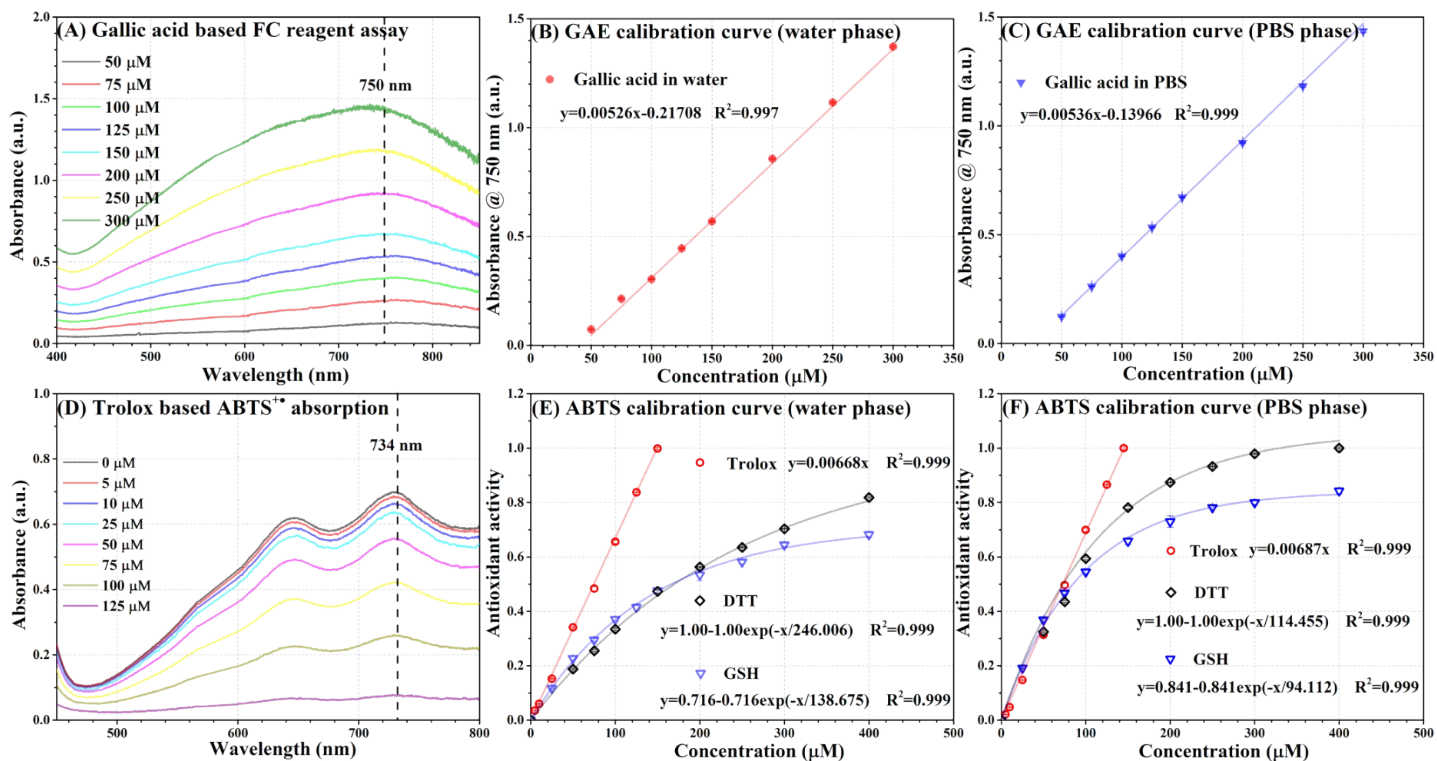

239 **Fig. S6.** Visible spectrophotometric methods in phenolic composition and antioxidant capacity determination of HULIS samples. (A)-  
 240 (C) calibration curve for gallic acid as reference in phenolic quantification using FC reagent assay. (D)-(R) calibration curve for trolox  
 241 being equivalent standard in antioxidant capacity test via ABTS radical method.

## 242 **Text S5. HULIS cytotoxicity**

243 **Cell culture and exposure to HULIS extracts.** The human alveolar epithelial adenocarcinoma cell line A549 (CCL-185™,  
244 ATCC®) were cultured in RPMI (Gibco, Thermo Fisher Scientific, MA, US) supplemented with 10% fetal bovine serum  
245 (FBS) and 5 µg mL<sup>-1</sup> penicillin/streptomycin (Biological Industries) in a humidified atmosphere of 95% purified air and 5%  
246 CO<sub>2</sub> at 37 °C. The cells were exposed to various HULIS extracts as well as a blank control group. The HULIS extracts were  
247 used at concentrations of 200 and 300 mg OC/L in a serum-free medium containing salts and glucose. The medium  
248 comprises 50 mM HEPES, 100 mM NaCl, 5 mM KCl, 2 mM CaCl<sub>2</sub>, and 5 mM glucose, with a pH of 7.2 to maintain  
249 osmolarity. The working concentrations of HULIS were determined through preliminary tests to establish appropriate range  
250 limits.

251 **Cell viability.** Cell death was assessed using propidium iodide (PI), a DNA-intercalating dye that is not taken up by viable  
252 cells. After being exposed to HULIS extracts for 5 hours, the cells were stained with 1 µg mL<sup>-1</sup> of PI for 20 minutes in the  
253 dark. Subsequently, the fluorescence was measured by a flow cytometry (Amnis CellStream, Luminex, USA) with  
254 excitation (Ex) at 488 nm and emission (Em) at 610 nm. Data were collected for 10,000 cells.

255 **ROS production.** Following a 5-hour exposure to HULIS extracts, the cells were incubated with a probe solution containing  
256 25 µM of 2',7'-dichlorofluorescein diacetate (DCF) or dihydroethidium (DHE) for 15-20 minutes at 37 °C in the dark. The  
257 fluorescence was measured from 10,000 cells by flow cytometer (Amnis CellStream, Luminex, USA). The DCF probe  
258 fluorescence was measured at 488 nm excitation and 529 nm emission, while the DHE probe fluorescence was measured at  
259 488 nm excitation and 620 nm emission. Within each experiment, the fluorescence intensities of cells exposed to HULIS  
260 were normalized to those of the control group. The results obtained from the DCF probe measurements were considered as  
261 the measurement of total reactive oxygen species (ROS). While, the measurements obtained from the DHE probe  
262 represented signals for the superoxide anion (O<sub>2</sub>•<sup>-</sup>).

263 **Lipid peroxidation.** Boron dipyrromethene difluoride (BODIPY) assay was applied to quantify lipid peroxidation from  
264 A549 cells after HULIS exposure. BODIPY solution incubated with the cells for 30 min, then levels of oxidized and  
265 unoxidized BODIPY were measured at 485/520 nm (Ex/Em) and 580/595 nm (Ex/Em), respectively. The lipid peroxidation  
266 result was represented as a ratio of oxidized to unoxidized BODIPY.

267 **Statistical analysis.** The results are expressed as the mean ± standard deviation (SD). Differences between group means  
268 were tested by one-way ANOVA with Welch modification for heteroscedastic data. Differences were considered significant  
269 at a probability level of p<0.05 using Tukey's honestly significant difference hypothesis testing. The statistical analysis was  
270 performed in GraphPad #8 software and graphical displayed using OriginPro 9.0.



**Table S2.** Summarized HULIS chemical features and redox potentials following atmospheric heterogeneous agings

| HULIS Samples                               | O/C         | H/C         | N/C         | OM/OC       | $OP_{OC\_PBS}^{DTT}$<br>( $\text{pmol min}^{-1} \mu\text{g}^{-1} \text{OC}$ ) | $OP_{OM\_PBS}^{DTT}$<br>( $\text{pmol min}^{-1} \mu\text{g}^{-1} \text{OM}$ ) | ABTS_PBS<br>( $\text{nmol } \mu\text{g}^{-1} \text{OC}$ ) | GAE_PBS<br>( $\text{nmol } \mu\text{g}^{-1} \text{OC}$ ) | Density<br>( $\text{g cm}^{-3}$ ) |
|---------------------------------------------|-------------|-------------|-------------|-------------|-------------------------------------------------------------------------------|-------------------------------------------------------------------------------|-----------------------------------------------------------|----------------------------------------------------------|-----------------------------------|
| <b>Fresh</b>                                | 0.355±0.016 | 1.417±0.013 | 0.009±0.002 | 1.604±0.102 | 115.2±8.6                                                                     | 71.8±7.0                                                                      | 5.53±0.40                                                 | 4.78±0.23                                                | 1.22                              |
| <b>Dry 5ppm O<sub>3</sub> oxidation</b>     | 0.419±0.015 | 1.422±0.009 | 0.008±0.002 | 1.687±0.118 | 114.4±7.2                                                                     | 67.8±6.4                                                                      | 4.83±0.27                                                 | 4.38±0.31                                                | 1.22                              |
| <b>Dry 15ppm O<sub>3</sub> oxidation</b>    | 0.438±0.015 | 1.416±0.019 | 0.007±0.002 | 1.710±0.137 | 105.2±6.8                                                                     | 61.5±6.3                                                                      | 4.57±0.32                                                 | 4.05±0.22                                                | 1.22                              |
| <b>Dry 25ppm O<sub>3</sub> oxidation</b>    | 0.454±0.012 | 1.411±0.017 | 0.009±0.002 | 1.733±0.108 | 98.4±7.9                                                                      | 56.8±5.8                                                                      | 4.38±0.29                                                 | 3.85±0.24                                                | 1.20                              |
| <b>30%RH 25ppm O<sub>3</sub> oxidation</b>  | 0.535±0.036 | 1.395±0.009 | 0.010±0.003 | 1.843±0.157 | 77.9±6.8                                                                      | 42.3±5.2                                                                      | 3.78±0.25                                                 | 3.44±0.20                                                | 1.23                              |
| <b>45%RH 25ppm O<sub>3</sub> oxidation</b>  | 0.629±0.028 | 1.386±0.011 | 0.006±0.001 | 1.961±0.094 | 71.9±5.4                                                                      | 36.7±3.9                                                                      | 3.28±0.27                                                 | 2.89±0.17                                                | 1.25                              |
| <b>75%RH 25ppm O<sub>3</sub> oxidation</b>  | 0.721±0.034 | 1.381±0.012 | 0.009±0.002 | 2.087±0.132 | 60.9±4.0                                                                      | 29.2±2.7                                                                      | 2.54±0.13                                                 | 2.00±0.12                                                | 1.25                              |
| <b>Low-level NO<sub>3</sub>• oxidation</b>  | 0.442±0.013 | 1.405±0.013 | 0.022±0.004 | 1.772±0.090 | 113.4±6.4                                                                     | 64.1±4.9                                                                      | 4.83±0.31                                                 | 3.86±0.24                                                | 1.22                              |
| <b>High-level NO<sub>3</sub>• oxidation</b> | 0.483±0.016 | 1.395±0.009 | 0.040±0.005 | 1.832±0.069 | 111.8±6.9                                                                     | 60.9±4.5                                                                      | 4.43±0.20                                                 | 3.48±0.17                                                | 1.21                              |

Note: elemental ratios and OM/OC were derived from AMS spectrum. Redox potential results were measured for HULIS in PBS. Dehydrated particle densities were measured using AAC-SMPS system.  $OP_{OM\_PBS}^{DTT}$  and  $OP_{OC\_PBS}^{DTT}$  are organic carbon (OC) and organic matter (OM) normalized  $OP^{DTT}$ , respectively.

271 **Text S6. Elemental changes in HULIS aerosol following heterogeneous aging**

272 Pseudo-first-order wall loss rates for HULIS particles through the AFR were estimated in blank tests based on SMPS  
 273 measurements. RH-dependent ensemble particle wall losses are summarized in Table S1. In the experiments, HULIS  
 274 processed in the AFR were corrected for wall loss via Equation S18, then wall-loss corrected HULIS concentrations were  
 275 applied in the quantitative analysis of chemical changes.

$$m = \rho \times \sum_i N_i \times e^{-k_{pi} \times \frac{\pi}{6} D_i^3} \quad \text{Eq.S18}$$

277 Where  $\rho$  ( $\text{g cm}^{-3}$ ) is the ensemble dehydrated particle density.  $N_i$  ( $\text{cm}^{-3}$ ) is the AFR output particle number concentration  
 278 of size bin  $i$ th.  $k_{pi}$  ( $\text{s}^{-1}$ ) is the size-dependent particle wall loss rate of size bin  $i$ th.  $D_i$  is the particle diameter of size  
 279 bin  $i$ th. HULIS particle densities were calculated by comparing the particle aerodynamic and mobility size distributions  
 280 via Aerodynamic Aerosol Classifier (AAC)-SMPS system.<sup>7</sup> The densities for fresh and multiple processed HULIS are  
 281 in range of 1.20-1.25  $\text{g cm}^{-3}$ . Particle-size resolved  $k_{pi}$  is displayed in Figure S7A.

282 After wall loss corrections for HULIS aerosols, the organic elemental mass concentrations were calculated based on  
 283 AMS results of bulk aerosol elemental features. To make it clear, HULIS aerosol mass concentrations were normalized  
 284 to the fresh one. The elemental mass concentration was calculated according to Equation S19:

$$e_{i,j} = \frac{m_i}{m_0} \times f_{i,j} \quad \text{Eq.S19}$$

286 In Eq. S16,  $e_{i,j}$  is mass concentration of element  $j$  (e.g., C, N, O, H) in  $i$ th HULIS sample (fresh and various  
 287 atmospherically aged HULIS).  $m_0$  is wall loss corrected mass concentration for fresh HULIS,  $m_i$  is wall loss corrected  
 288 mass concentration for  $i$ th HULIS.  $f_{i,j}$  is the fraction of organic elemental  $j$  in bulk aerosol  $i$ . The results for the organic  
 289 elemental concentration changes normalized to fresh HULIS are displayed in Figure S7B-D.

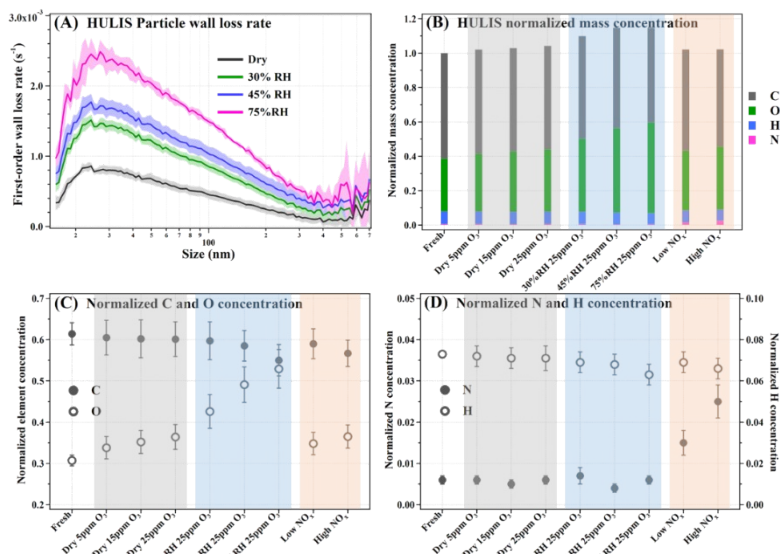

290 **Fig. S7.** (A) Size-resolved first-order wall loss rates of HULIS particles as a function of RH in the AFR; (B) The changes in  
 291 HULIS wall-loss corrected elemental mass concentrations that were normalized to the fresh concentrations; (C) Changes of  
 292 organic carbon and oxygen mass concentrations for HULIS regarding diverse aging processes; (D) Changes of organic nitrogen

293 and hydrogen mass concentrations for HULIS regarding diverse aging processes. Three shaded regions in Panel B-D indicate  
294 results from dry ozonolysis (light gray), RH-influenced O<sub>3</sub> oxidation (light blue), and NO<sub>3</sub>• oxidation (light red) of HULIS.

295

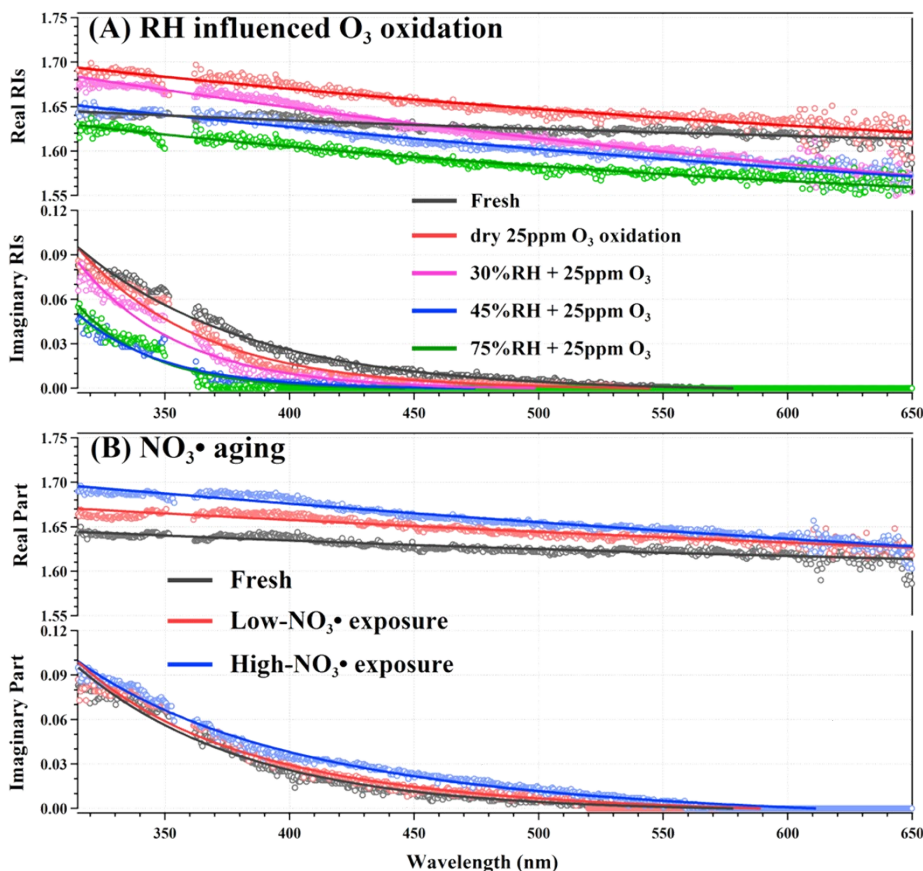

296 **Fig. S8.** The evolution of the complex Refractive Indices (RIs) of HULIS particles in heterogeneous O<sub>3</sub> oxidation (A) and NO<sub>3</sub>• reaction  
297 (B). The errors are not displayed for graphics simplification. Circles denote the raw retrieved RIs, solid lines are regression results.  
298 Exponential functions were applied to regress the real part of RIs, and power-law functions were taken to depict imaginary part  
299 distributions.

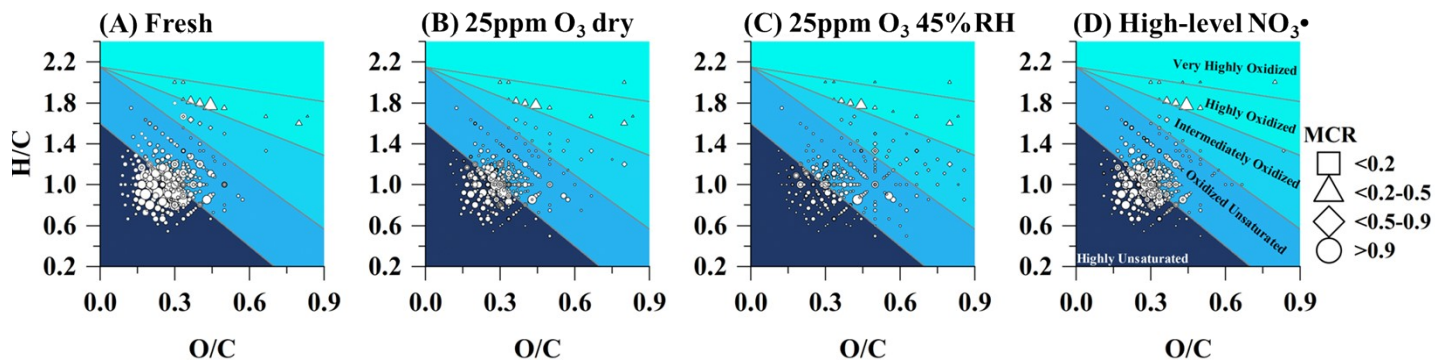

300

301 **Fig. S9.** MCR-VK diagrams of fresh (A) and diversely aged (B-D) HULIS. The shape of open symbol corresponds to the different MCR  
 302 value range, and the size of the symbol indicates the relative intensity of formula from HRMS detection. Five compositional spaces of  
 303 molecules are classified as: very highly oxidized , highly oxidized, intermediately oxidized, oxidized unsaturated, and highly  
 304 unsaturated.

305

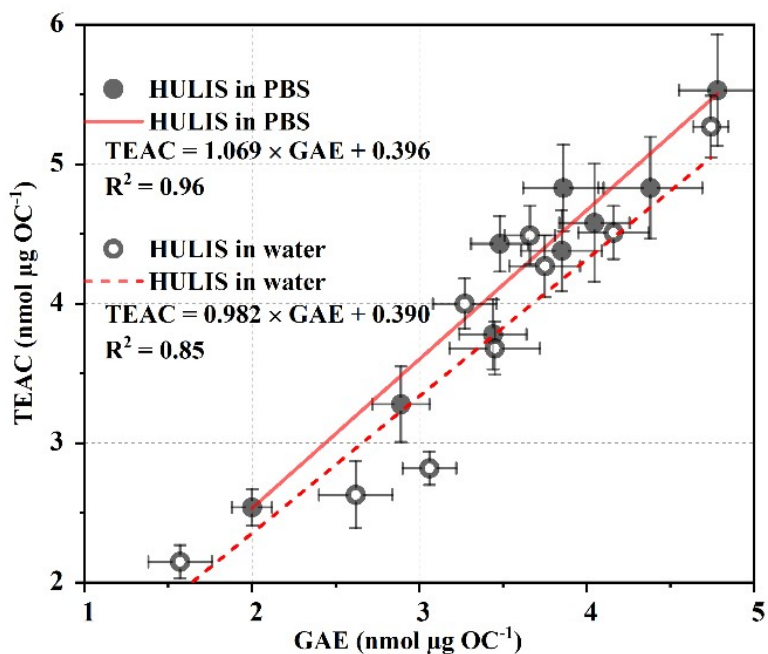

306 **Fig. S10.** Linear correlation between GAE and TEAC for HULIS in atmospheric agings.

307 **Text S7. HULIS redox chemical lifetime during nighttime atmospheric agings**

308 The half-lifetime ( $\tau_{1/2}$ ) of chemicals contributing to redox potential of HULIS can be estimated from changes of wall-  
 309 loss corrected HULIS concentration, mass normalized redox potential, and O<sub>3</sub> or NO<sub>3</sub>• sink to particles in extensive  
 310 agings. In short, the gaseous oxidant uptake by particles ( $F$ ) after reaction time of  $t$  can be described as Equation S20

311 that is modified from Equation S3:  
 312 
$$F_{G,P} = \kappa_{p,O_3} \times [G] \times t = \frac{\gamma_{eff,G} \times \omega_G \times S_p}{4} \times [G] \times t$$
 Eq. S20

313 Equation S20 can be further modified as:  
 314 
$$F_{G,P} = \frac{\gamma_{eff,G} \times \omega_G}{S_p} \times [G] \times t$$
 Eq. S21

315 Where  $F_{G,P}$  is gaseous oxidant normalized surface uptake (molecules mm<sup>-2</sup>). Thus, the half-lifetime ( $\tau_{1/2}$ ) correlates the  
 316 critical oxidant uptake that induces chemical half-decay ( $F_{G,R/2}$ ):

317 
$$F_{G,R/2} = \frac{\gamma_{eff,G} \times \omega_G}{4} \times [G] \times \tau_{1/2}$$
 Eq. S22

318 
$$\tau_{1/2} = \frac{F_{G,R/2}}{\gamma_{eff,G} \times \omega_G \times [G]} \times F_{G,R/2}$$
 Eq. S23

319 The concentration of chemicals ( $C_{RP}$ ) that contribute to antioxidant capacity and oxidative potential of HULIS was  
 320 calculated via Equation S24:

321 
$$C_{RP} = C_{OC} \times RP$$
 Eq.S24

322  $C_{OC}$  is wall-loss corrected particulate organic carbon mass concentration (Text S6, Figure S7),  $RP$  is short of redox  
 323 potential in term of PBS solution-based GAE, TEAC, and  $OP_{OC-PBS}^{DTT}$  that are normalized to particulate organic carbon  
 324 mass concentration.

325 We assumed that  $C_{RP}$  followed the pseudo second-order kinetic change in reaction with O<sub>3</sub> or NO<sub>3</sub>•. Therefore, the  
 326  $C_{RP}$  evolved exponentially with gaseous oxidant surface uptake or exposure, the critical gaseous oxidant surface uptake  
 327 ( $F_{G,R/2}$ ) that induced half-decay of  $C_{RP}$  can be derived from linear regression between  $\ln(\frac{C_{RP,0}}{C_{RP}})$  and  $F_{G,P}$  for HULIS

328 upon dry ozonolysis, RH-dependent O<sub>3</sub> oxidation and NO<sub>3</sub>• reaction, respectively. The slopes ( $S_{lop}$ ) were derived to

329 estimate  $F_{G,R/2}$  in Equation S25:

330 
$$F_{G,R/2} = \frac{F_{G,R/2}}{S_{lop}}$$
 Eq.S25

331 The linear regression and regressed slope were present in Figure S11 below. Combining Equation S23 and S25, the  
 332 half-lifetime is:

333 
$$\tau_{1/2} = \frac{4}{\gamma_{eff,G} \times \omega_G \times [G]} \times \frac{\ln(2)}{S_{lop}}$$
 Eq. S26

334 Meantime, the effective second-order reaction kinetic ( $K_{RP,G}$ ) between RP and gaseous oxidant G can be calculated  
 335 as:

336 
$$K_{RP,G} = \frac{1}{4 \gamma_{eff,G} \times \omega_G \times S_{lop}}$$
 Eq. S27

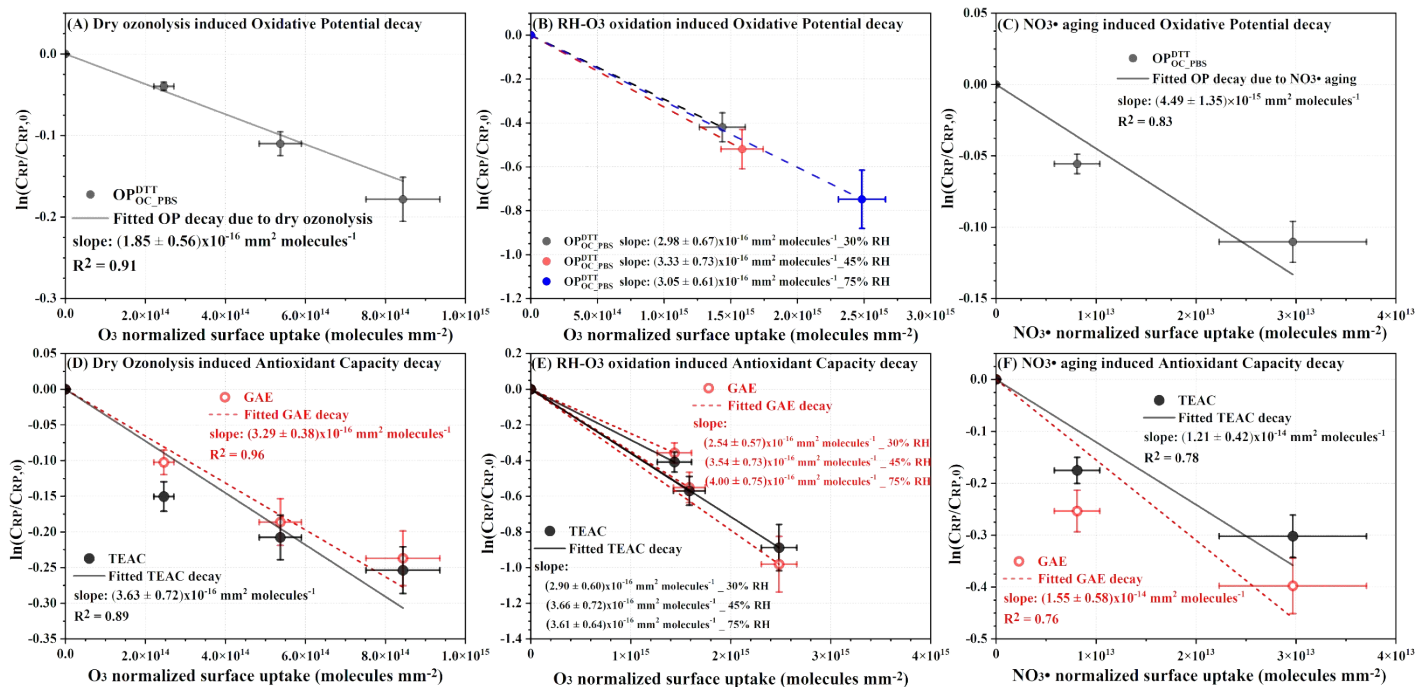

337 **Fig. S11.** Linear correlation between HULIS borne redox chemical decay and gaseous oxidant normalized surface uptake. A-C profile  
 338 oxidative potential contributor decay due to  $\text{O}_3$  or  $\text{NO}_3^\bullet$  oxidation. D-F display antioxidant capacity contributor decay upon  $\text{O}_3$  or  $\text{NO}_3^\bullet$   
 339 aging.

340 According to  $\text{O}_3$  sink analysis in the AFR (Text S1), the HULIS particle effective surface uptake coefficient ( $\mathcal{V}_{eff,\text{O}_3}$ )  
 341 of  $\text{O}_3$  was a function of  $\text{O}_3$  concentration (ppm) or RH (%). The functions regarding dry (Eq. S28) and humidity (Eq.  
 342 S30) conditions were described in Figure S2 and presented below:

$$343 \mathcal{V}_{eff,\text{O}_3} = 5.82 \times 10^{-5} + 5.11 \times 10^{-5} \times e^{-0.16 \times [\text{O}_3]} \quad \text{Eq. S28}$$

$$344 \mathcal{V}_{eff,\text{RH}} = -2.18 \times 10^{-5} + 8.04 \times 10^{-5} \times e^{\frac{\text{RH}}{77.56}} \quad \text{Eq. S29}$$

345 Equation S29 is built on initial  $\text{O}_3$  concentration of 25 ppm, to extrapolate RH effect on  $\mathcal{V}_{eff,\text{O}_3}$  at other  $\text{O}_3$  level, we  
 346 assumed that  $\mathcal{V}_{eff,\text{O}_3}$  scales with that in RH effect on the basis of dry condition, thus, integrated  $\mathcal{V}_{eff,\text{O}_3,\text{RH}}$  can be derived:

$$347 \mathcal{V}_{eff,\text{O}_3,\text{RH}} = \mathcal{V}_{eff,\text{O}_3} \times \frac{\mathcal{V}_{eff,\text{RH}}}{\mathcal{V}_{eff,0\% \text{RH}}} = (5.82 \times 10^{-5} + 5.11 \times 10^{-5} \times e^{-0.16 \times [\text{O}_3]}) \times (1.37 \times e^{\frac{\text{RH}}{77.56}} - 0.37) \quad \text{Eq. S30}$$

348 To  $\text{NO}_3^\bullet$  aging, a fixed effective uptake coefficient ( $\mathcal{V}_{eff,\text{NO}_3^\bullet}$ ) of  $(1.1 \pm 0.2) \times 10^{-2}$  was applied as discussed in Text S1.  
 349 Above all, the half-lifetime of HULIS redox active compositions in reaction with  $\text{O}_3$  or  $\text{NO}_3^\bullet$  were sensitively estimated  
 350 with varying field average  $\text{O}_3$  concentration of 5-75 ppb and  $\text{NO}_3^\bullet$  concentration of 5-100 ppt. The results are displayed in  
 351 Figure S12. The effective second-order reaction kinetics ( $K_{RP,G}$ ) between RP and  $\text{O}_3$  or  $\text{NO}_3^\bullet$  were calculated and  
 352 summarized in Table 1.

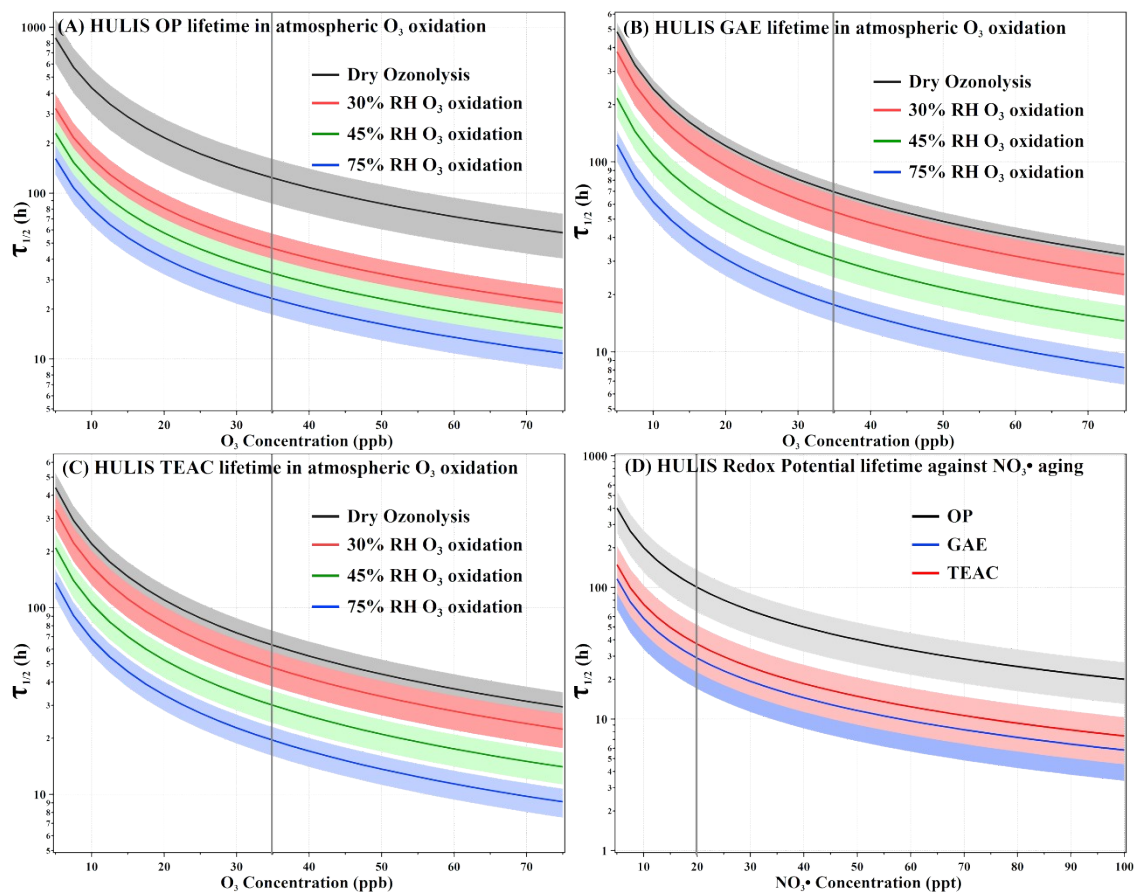

353 **Fig. S12.** Half-lifetime of HULIS redox potential against atmospheric O<sub>3</sub> or NO<sub>3</sub>• oxidation as a function of gaseous oxidant  
 354 concentration. The solid gray line indicates lifetime corresponding to the commonly applied filed average oxidant concentration, which  
 355 is 35ppb for O<sub>3</sub> and 20ppt for NO<sub>3</sub>•.

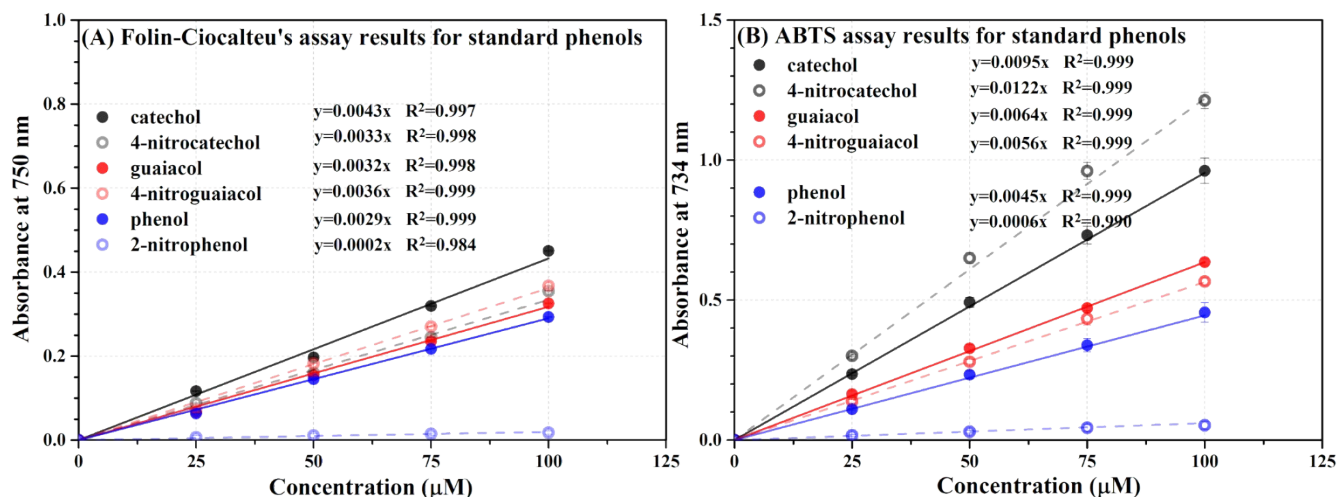

356 **Fig. S13.** Calibration function comparison between phenols and their corresponded nitrophenols in FC and ABTS assays.

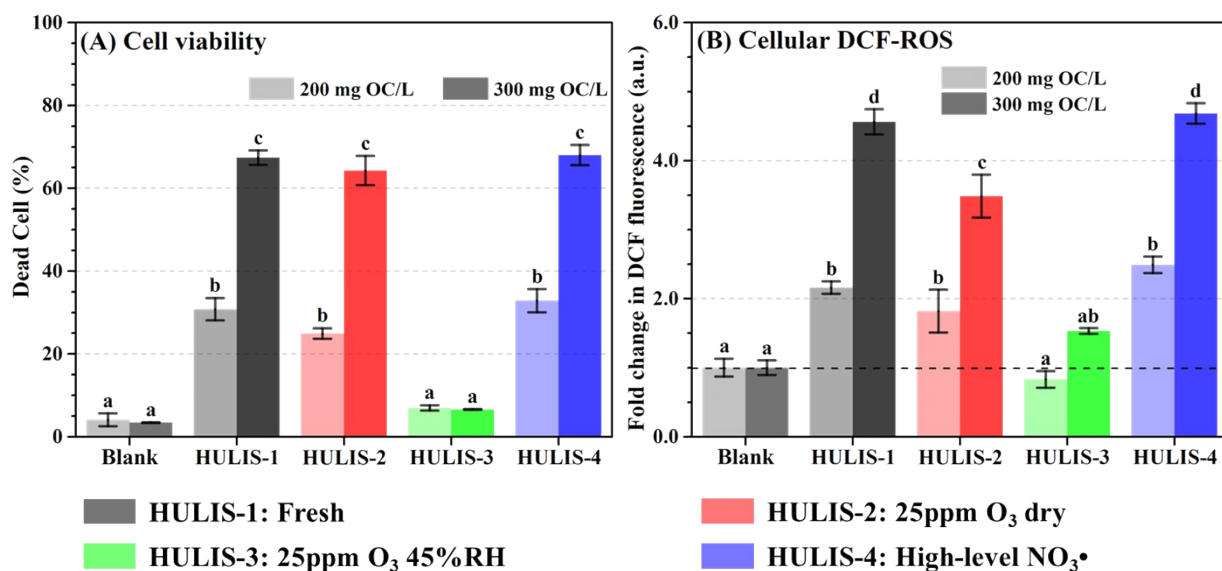

357 **Fig. S14.** Cell viability and ROS after HULIS exposure in A549. Cell viability (A) and ROS generation (B) following 5 h exposure to  
 358 HULIS at concentration of 200 vs. 300 mg OC L<sup>-1</sup>. Four types of HULIS from various atmospheric process were tested. Bar height and  
 359 error bars represent arithmetic mean ± SEM of cell death and florescence normalized to blank values. Mean with different letters are  
 360 significant different at  $p < 0.05$  (Turkey HSD test). Four kinds of atmospheric processed HULIS were tested, including fresh one  
 361 (HULIS-1), 25ppm O<sub>3</sub> oxidized samples under dry (HULIS-2) and at 45%RH (HULIS-3) conditions, and high-level NO<sub>3</sub>• oxidized  
 362 samples (HULIS-4).



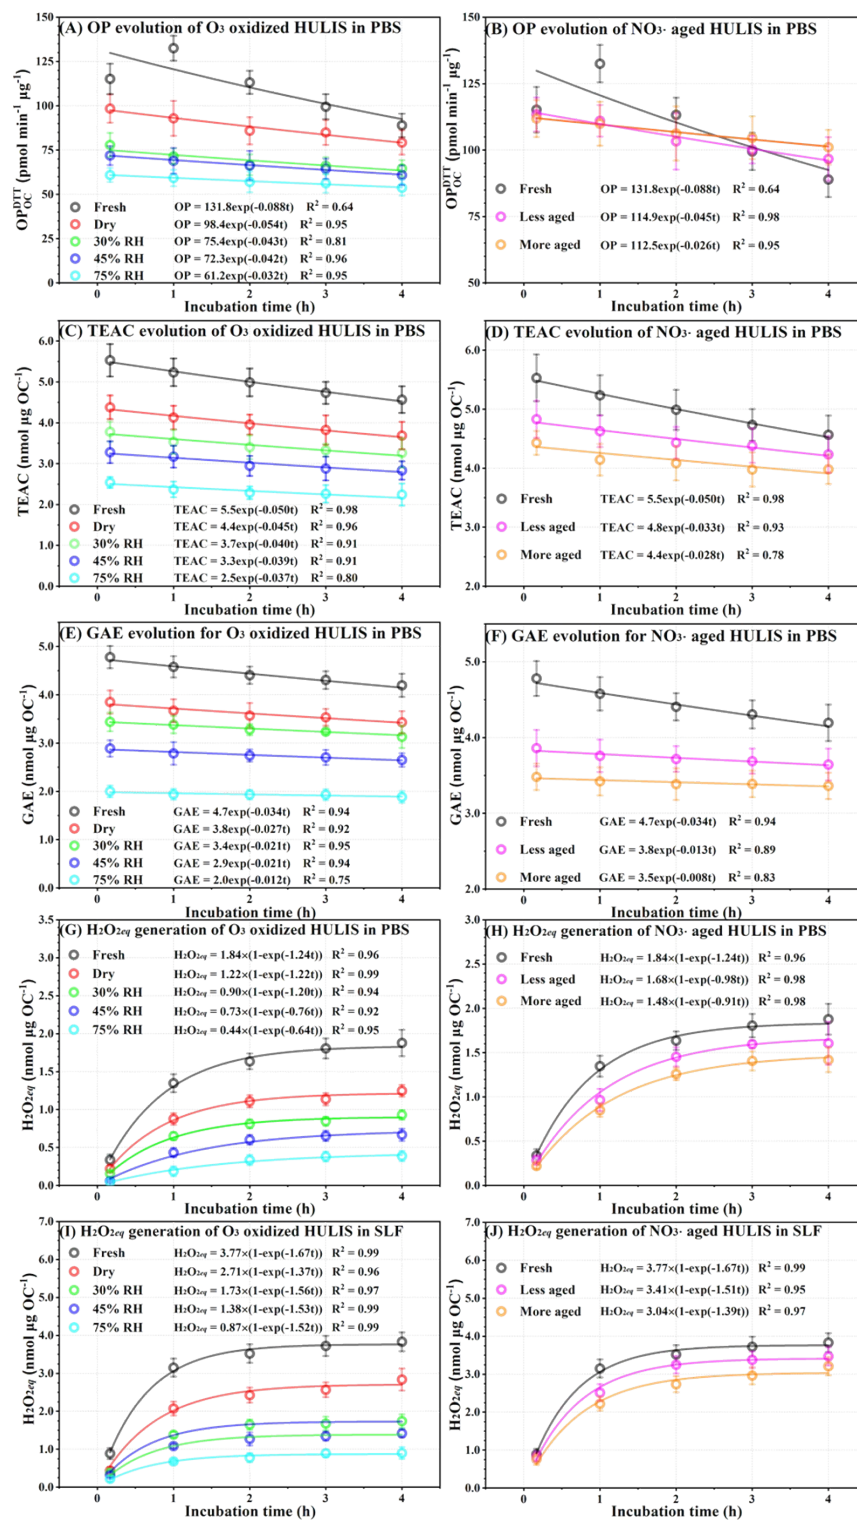

363 **Fig. S15.** Redox potential and equivalent  $\text{H}_2\text{O}_2$  ( $\text{H}_2\text{O}_2\text{eq}$ ) generation evolution for fresh and atmospheric aged HULIS in PBS and  
 364 surrogate lung fluid solutions over the course of 4 h incubation openly at 37 °C in the dark. These HULIS were heterogeneously aged  
 365 from RH-influenced  $\text{O}_3$  oxidation and varying  $\text{NO}_3^\bullet$  reactions. The results for redox potentials and  $\text{H}_2\text{O}_2\text{eq}$  were exponentially regressed  
 366 in functions of Exp2PMod1 and BoxLucas1, respectively, using OriginPro 2021.

367 **Text S8. Simplified investigation of standard redox-active compounds in lung fluid environment**

368 1,4-Naphthaquinone (1,4-NQ) and Gallic acid were selected as standard redox-active compounds to quantify the relative redox potential of HULIS in current study.  
 369 These components were further used as proxy to illustrate the mechanisms for HULIS aqueous aging results at neutral lung fluid environment. Following the same  
 370 treatment to HULIS, 5 mg L<sup>-1</sup> 1,4-NQ, 25 mg L<sup>-1</sup> gallic acid, and their mixture were incubated in PBS solutions (pH 7.4) at 37 °C under oxic condition for 4 hours.  
 371 In every one hour since incubation, the OP<sup>DTT</sup>, GAE and H<sub>2</sub>O<sub>2</sub>eq were measured for each solution. The results are displayed in Figure S16. It was found that 1,4-NQ  
 372 had no signal response to Folin-Ciocalteu's assay or ABTS assay during the entire incubation period. The constant OP<sup>DTT</sup> and negligible H<sub>2</sub>O<sub>2</sub>eq generation indicated  
 373 stability of sole 1,4-NQ in PBS. There was no OP<sup>DTT</sup> or H<sub>2</sub>O<sub>2</sub>eq measured for gallic acid solution, and 4 hours' incubation did not pose significant change to the  
 374 mass concentration of gallic acid. Interestingly, the mixture of 1,4-NQ and gallic acid replicated the observed evolution pattern of HULIS that both the OP<sup>DTT</sup> and  
 375 GAE decreased in coupling with H<sub>2</sub>O<sub>2</sub>eq generation along with incubation. Noteworthy, the rates of redox potential changes and H<sub>2</sub>O<sub>2</sub>eq generation were different

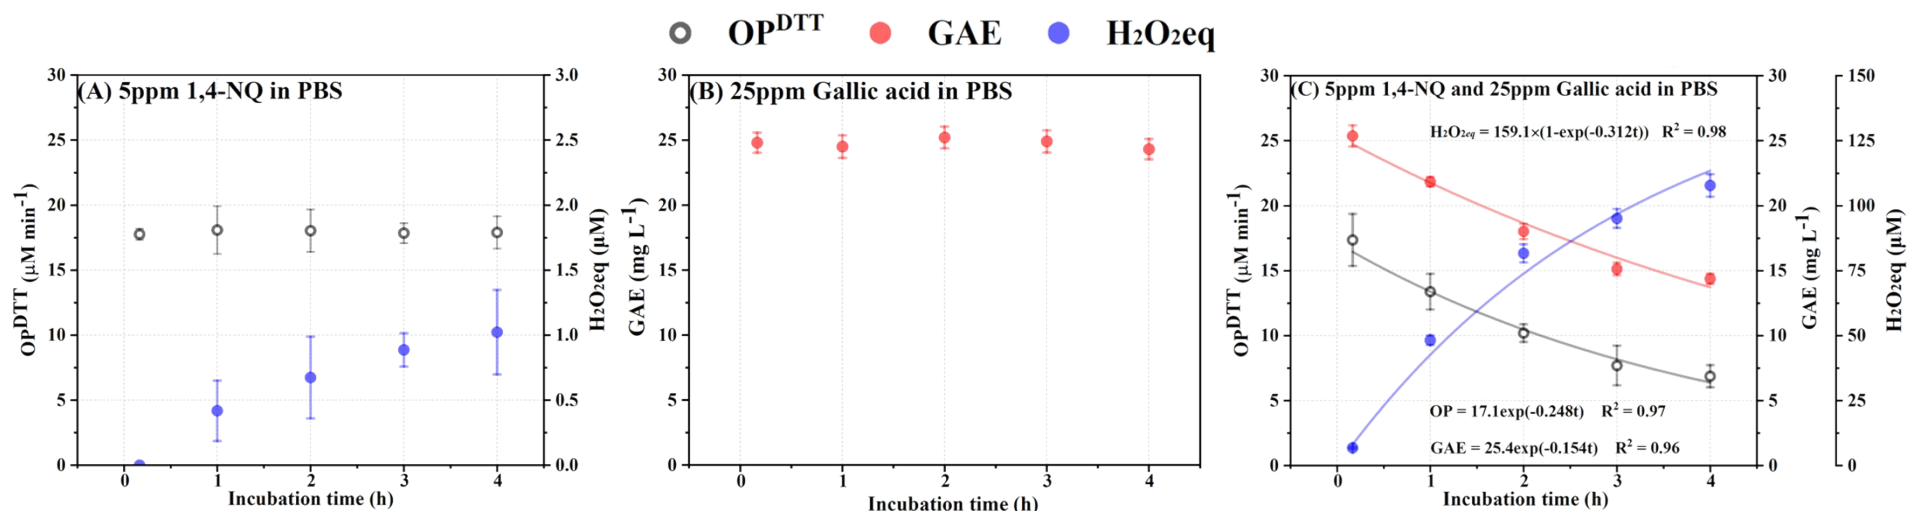

376 with that of HULIS, probably because of the more complicated redox-active compositions in HULIS.

377 **Fig. S16.** Simplified tests of 1,4-naphthaquinone (1,4-NQ for short), gallic acid, and their mixture in PBS solution over 4 hours' incubation at oxic condition and 37  
 378 °C. (A) Time-resolved OP<sup>DTT</sup> and H<sub>2</sub>O<sub>2</sub>eq generation for 1,4-naphthaquinone of 5 mg L<sup>-1</sup>. (B) Mass concentration changes for 25 mg L<sup>-1</sup> gallic acid. (C) Evolution of  
 379 OP<sup>DTT</sup>, H<sub>2</sub>O<sub>2</sub>eq, and gallic acid mass concentration for a mixture of 5 mg L<sup>-1</sup> 1,4-naphthaquinone and 25 mg L<sup>-1</sup> gallic acid.

## Reference.

- 1 J. N. Crowley, M. Ammann, R. A. Cox, R. G. Hynes, M. E. Jenkin, A. Mellouki, M. J. Rossi, J. Troe and T. J. Wallington, Evaluated kinetic and photochemical data for atmospheric chemistry: Volume V–heterogeneous reactions on solid substrates, *Atmospheric Chemistry and Physics*, 2010, **10**, 9059–9223.
- 2 P. Davidovits, C. E. Kolb, L. R. Williams, J. T. Jayne and D. R. Worsnop, Mass accommodation and chemical reactions at gas–liquid interfaces, *Chemical reviews*, 2006, **106**, 1323–1354.
- 3 M. Li, H. Su, G. Li, N. Ma, U. Pöschl and Y. Cheng, Relative importance of gas uptake on aerosol and ground surfaces characterized by equivalent uptake coefficients, *Atmospheric Chemistry and Physics*, 2019, **19**, 10981–11011.
- 4 Y. Rudich, N. M. Donahue and T. F. Mentel, Aging of organic aerosol: Bridging the gap between laboratory and field studies, *Annu. Rev. Phys. Chem.*, 2007, **58**, 321–352.
- 5 C. Baduel, M. E. Monge, D. Voisin, J.-L. Jaffrezo, C. George, I. E. Haddad, N. Marchand and B. D’Anna, Oxidation of atmospheric humic like substances by ozone: a kinetic and structural analysis approach, *Environmental science & technology*, 2011, **45**, 5238–5244.
- 6 T. Berkemeier, S. S. Steimer, U. K. Krieger, T. Peter, U. Pöschl, M. Ammann and M. Shiraiwa, Ozone uptake on glassy, semi-solid and liquid organic matter and the role of reactive oxygen intermediates in atmospheric aerosol chemistry, *Physical Chemistry Chemical Physics*, 2016, **18**, 12662–12674.
- 7 C. Li, Q. He, Z. Fang, S. S. Brown, A. Laskin, S. R. Cohen and Y. Rudich, Laboratory Insights into the Diel Cycle of Optical and Chemical Transformations of Biomass Burning Brown Carbon Aerosols, *Environmental science & technology*, 2020, **54**, 11827–11837.
- 8 C. Li, Q. He, A. P. S. Hettiyadura, U. Käfer, G. Shmul, D. Meidan, R. Zimmermann, S. S. Brown, C. George and A. Laskin, Formation of secondary brown carbon in biomass burning aerosol proxies through NO<sub>3</sub> radical reactions, *Environmental science & technology*, 2019, **54**, 1395–1405.
- 9 A. Zasyplin, V. M. Grigor’eva, V. N. Korchak and Y. M. Gershenson, A formula for summing of kinetic resistances for mobile and stationary media: I. Cylindrical reactor, *Kinetics and catalysis*, 1997, **38**, 772–781.
- 10 M. J. Tang, R. A. Cox and M. Kalberer, Compilation and evaluation of gas phase diffusion coefficients of reactive trace gases in the atmosphere: volume 1. Inorganic compounds, *Atmospheric Chemistry and Physics*, 2014, **14**, 9233–9247.
- 11 S. Gross, R. Iannone, S. Xiao and A. K. Bertram, Reactive uptake studies of NO<sub>3</sub> and N<sub>2</sub>O<sub>5</sub> on alkenoic acid, alkanolate, and polyalcohol substrates to probe nighttime aerosol chemistry, *Physical Chemistry Chemical Physics*, 2009, **11**, 7792–7803.
- 12 S. Gross and A. K. Bertram, Reactive uptake of NO<sub>3</sub>, N<sub>2</sub>O<sub>5</sub>, NO<sub>2</sub>, HNO<sub>3</sub>, and O<sub>3</sub> on three types of polycyclic aromatic hydrocarbon surfaces, *The Journal of Physical Chemistry A*, 2008, **112**, 3104–3113.
- 13 P. Lin, L. T. Fleming, S. A. Nizkorodov, J. Laskin and A. Laskin, Comprehensive molecular characterization of atmospheric brown carbon by high resolution mass spectrometry with electrospray and atmospheric pressure photoionization, *Analytical chemistry*, 2018, **90**, 12493–12502.
- 14 P. J. Roach, J. Laskin and A. Laskin, Higher-order mass defect analysis for mass spectra of complex organic mixtures, *Analytical chemistry*, 2011, **83**, 4924–4929.
- 15 E. Kendrick, A mass scale based on CH<sub>2</sub> = 14.0000 for high resolution mass spectrometry of organic compounds., *Analytical Chemistry*, 1963, **35**, 2146–2154.
- 16 Y. Zhang, K. Wang, H. Tong, R.-J. Huang and T. Hoffmann, The maximum carbonyl ratio (MCR) as a new index for the structural classification of secondary organic aerosol components, *Rapid Communications in Mass Spectrometry*, 2021, **35**, e9113.
- 17 S. Wang, J. Ye, R. Soong, B. Wu, L. Yu, A. J. Simpson and A. W. Chan, Relationship between chemical composition and oxidative potential of secondary organic aerosol from polycyclic aromatic hydrocarbons, *Atmospheric Chemistry and Physics*, 2018, **18**, 3987–4003.
- 18 S. Wang, M. Takhar, Y. Zhao and A. W. H. Chan, Dynamic Oxidative Potential of Organic Aerosol from Heated Cooking Oil, *ACS Earth and Space Chemistry*, 2021, 1150–1162.
- 19 Jiang, Ahmed, Canchola, Chen, and Lin, Use of Dithiothreitol Assay to Evaluate the Oxidative Potential of Atmospheric Aerosols, *Atmosphere*, 2019, **10**, 571.

- 20 C. Li, Z. Fang, H. Czech, E. Schneider, C. P. Ruger, M. Pardo, R. Zimmermann, J. Chen, A. Laskin and Y. Rudich, pH modifies the oxidative potential and peroxide content of biomass burning HULIS under dark aging, *Science of The Total Environment*, 2022, 155365.
- 21 S. Kupina, C. Fields, M. C. Roman and S. L. Brunelle, Determination of total phenolic content using the Folin-Ciocalteu assay: Single-laboratory validation, First action 2017.13, *Journal of AOAC International*, 2018, **101**, 1466–1472.
